# Supplementary material for: A study on the substituent effects of norbornadiene derivatives in iridium-catalyzed asymmetric [2 + 2] cycloaddition reactions
Source: Royal Society of Chemistry journal article supplement (doi:10.1039/c3ob27382b), 2013-01-01
Supplement: c3ob27382b.pdf [file c3ob27382b.pdf]

# Supporting Information

## Study on the Substituent Effects of Norbornadiene Derivatives in Iridium-Catalyzed Asymmetric [2+2] Cycloaddition Reactions

Jun Hu,<sup>†</sup> Qingjing Yang,<sup>†</sup> Lu Yu, Jianbin Xu, Shanshan Liu, Chao Huang, Lin Wang, Yongyun Zhou and Baomin Fan\*

Key Laboratory of Chemistry in Ethnic Medicinal Resources, State Ethnic Affairs Commission & Ministry of Education, Yunnan University of Nationalities, Kunming, 650500, China

<sup>†</sup> These two authors contributed equally to this paper

Fax: (+86)-871-5910017, E-mail: [adams.bmf@hotmail.com](mailto:adams.bmf@hotmail.com)

### Table of Contents

|                                                                                               |                |
|-----------------------------------------------------------------------------------------------|----------------|
| <b>1. Copies of <sup>1</sup>H and <sup>13</sup>C NMR spectra of compounds 2b-g, 2k-x.....</b> | <b>S2-S21</b>  |
| <b>2. Copies of HPLC spectra of compounds 2b-g, 2k-x.....</b>                                 | <b>S22-S41</b> |

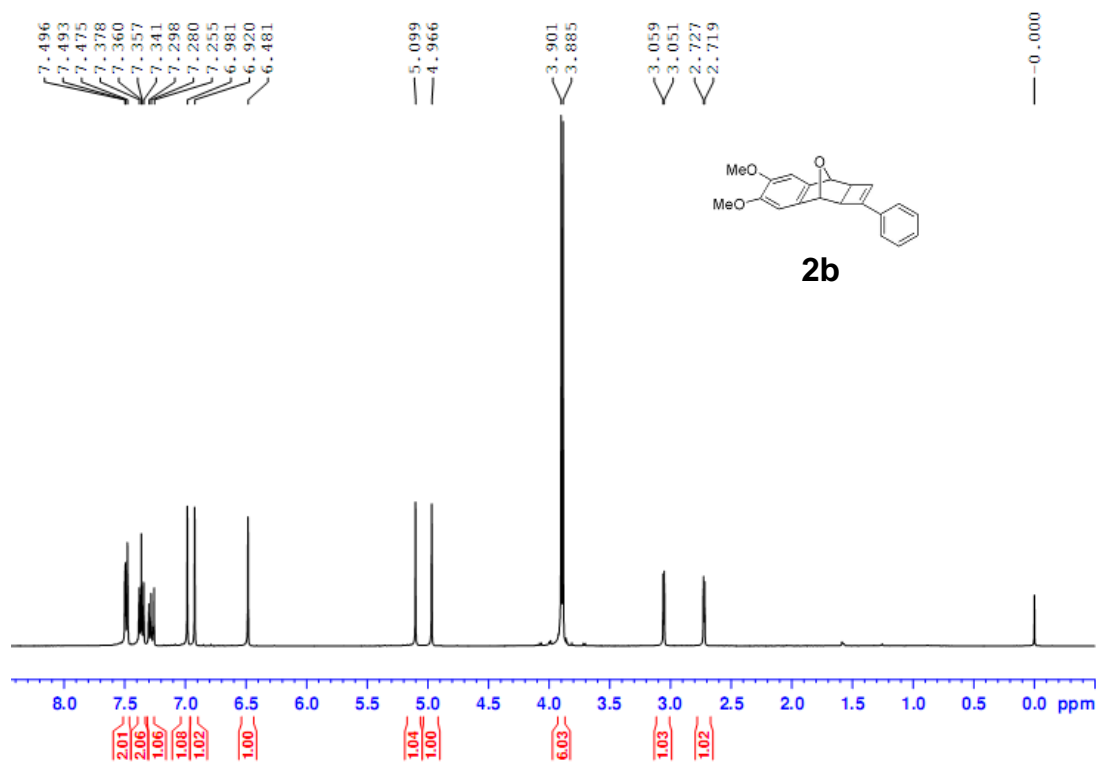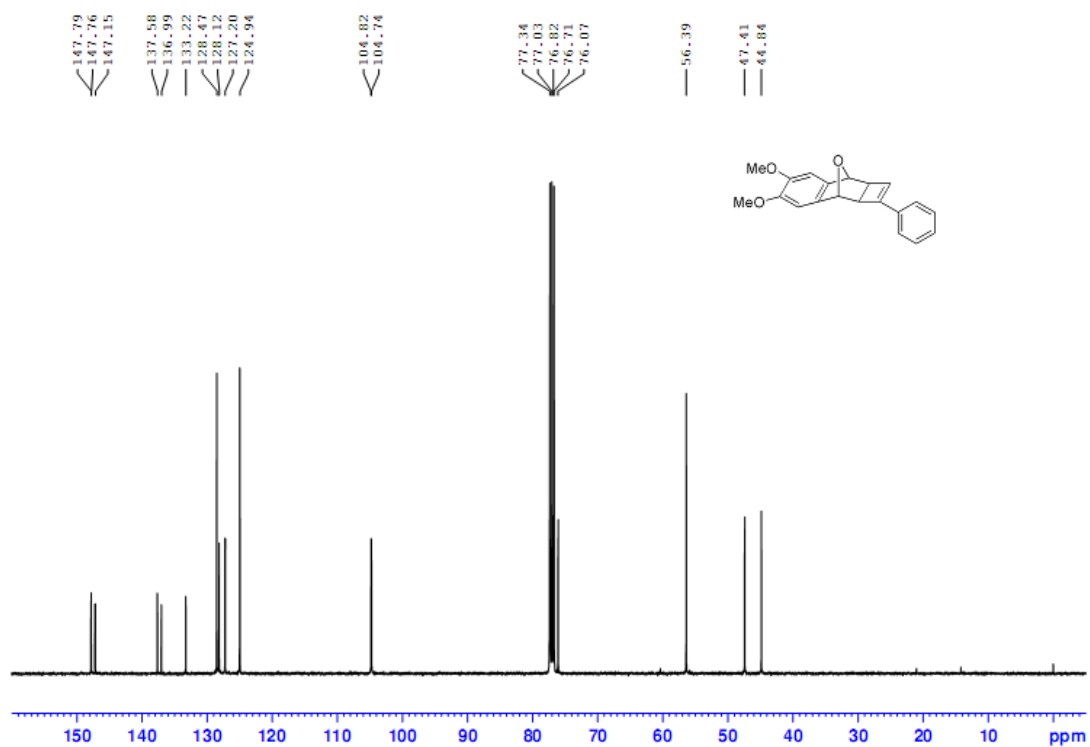

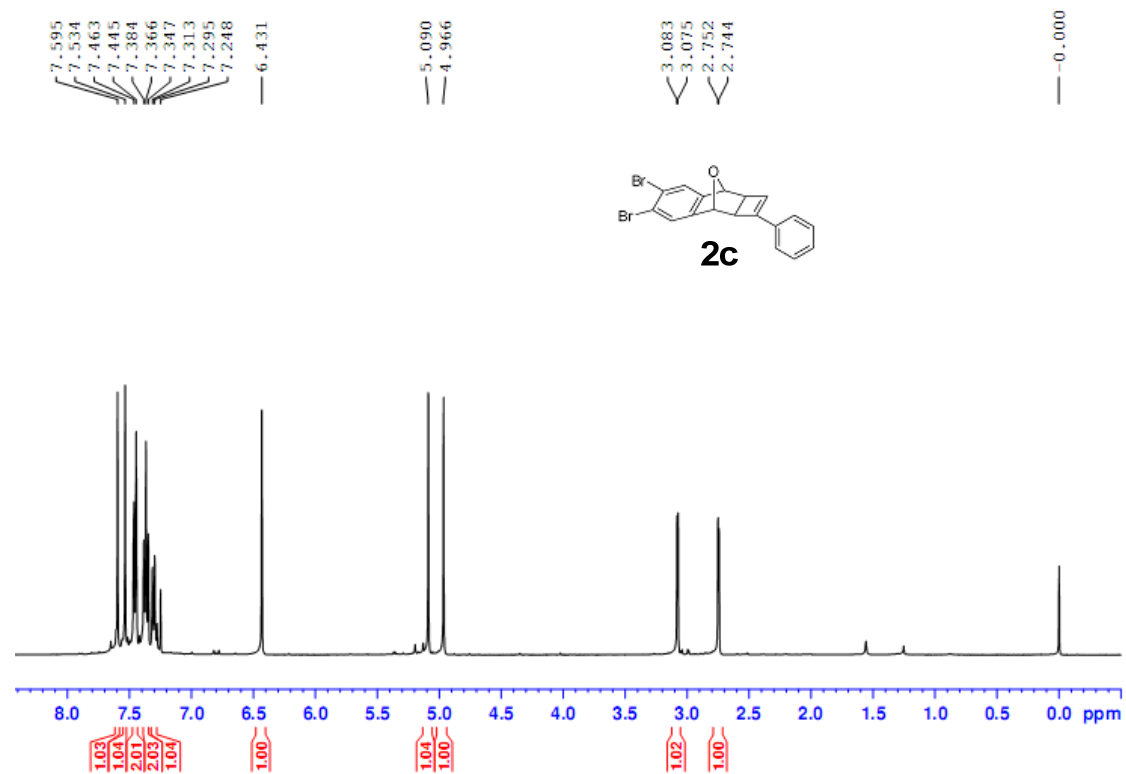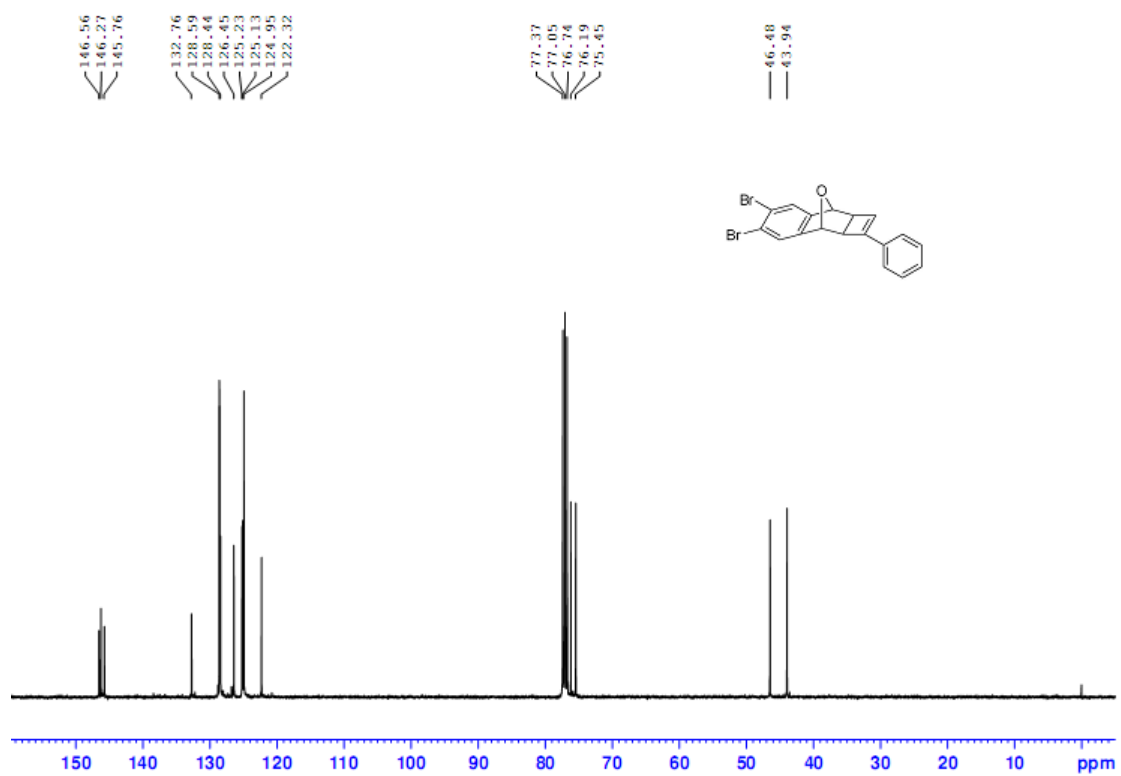

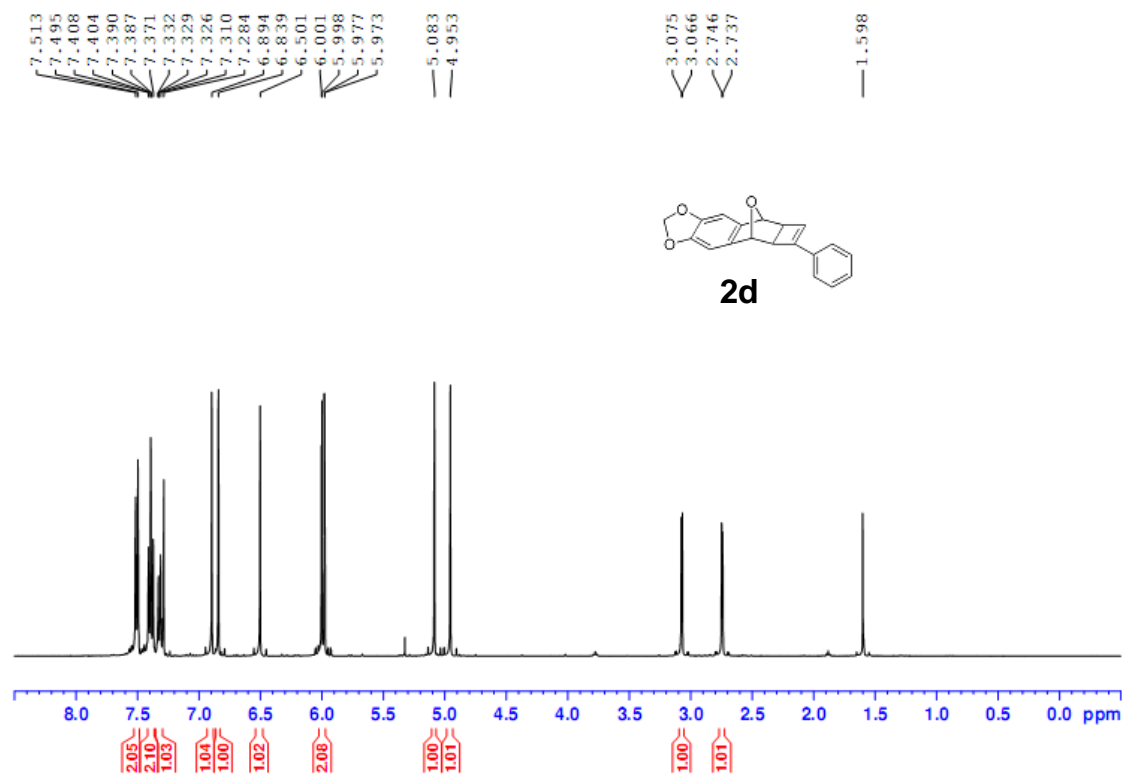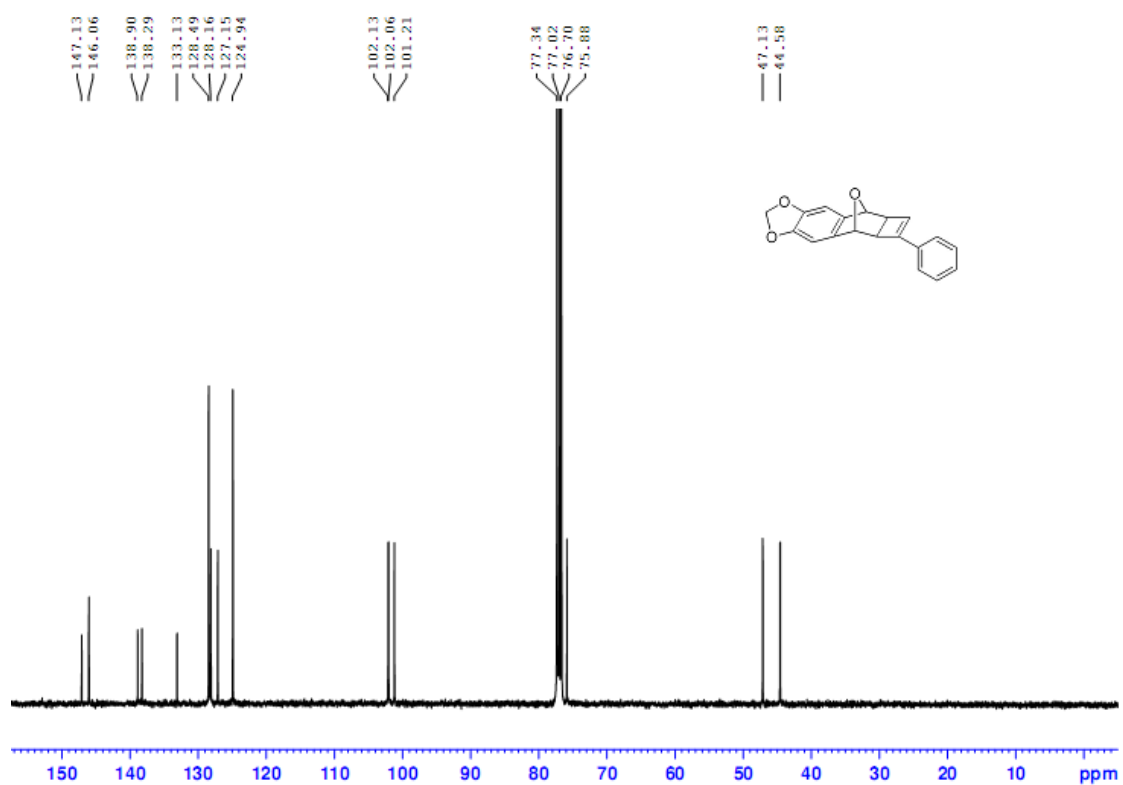



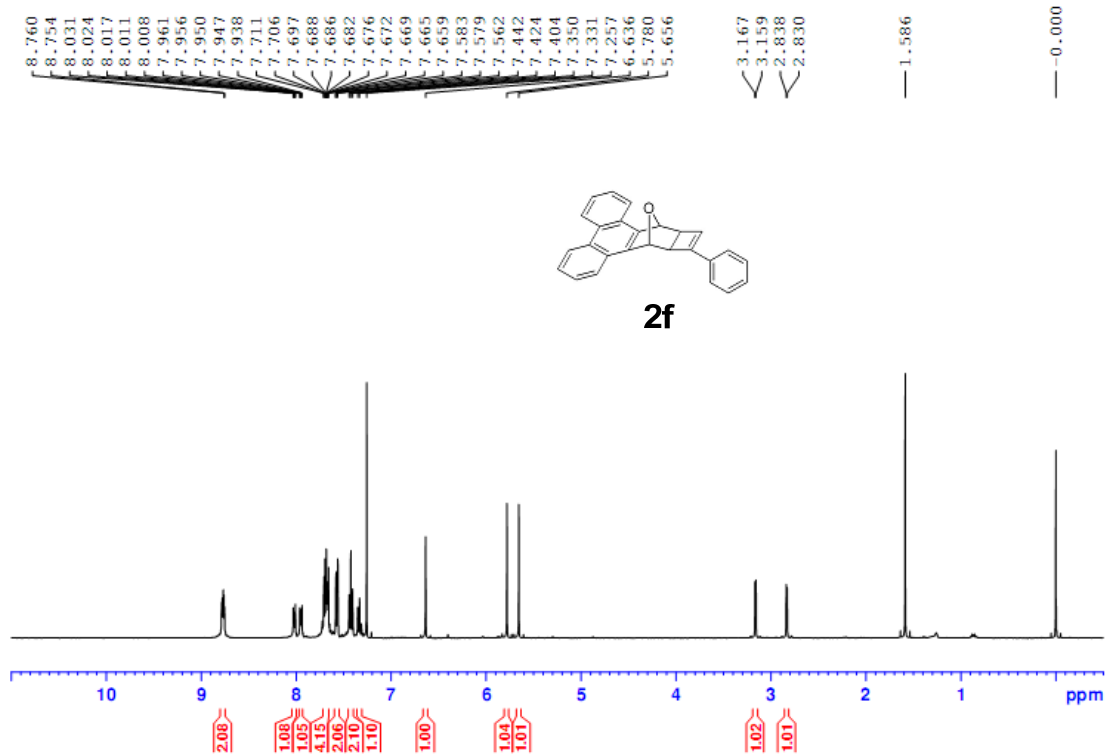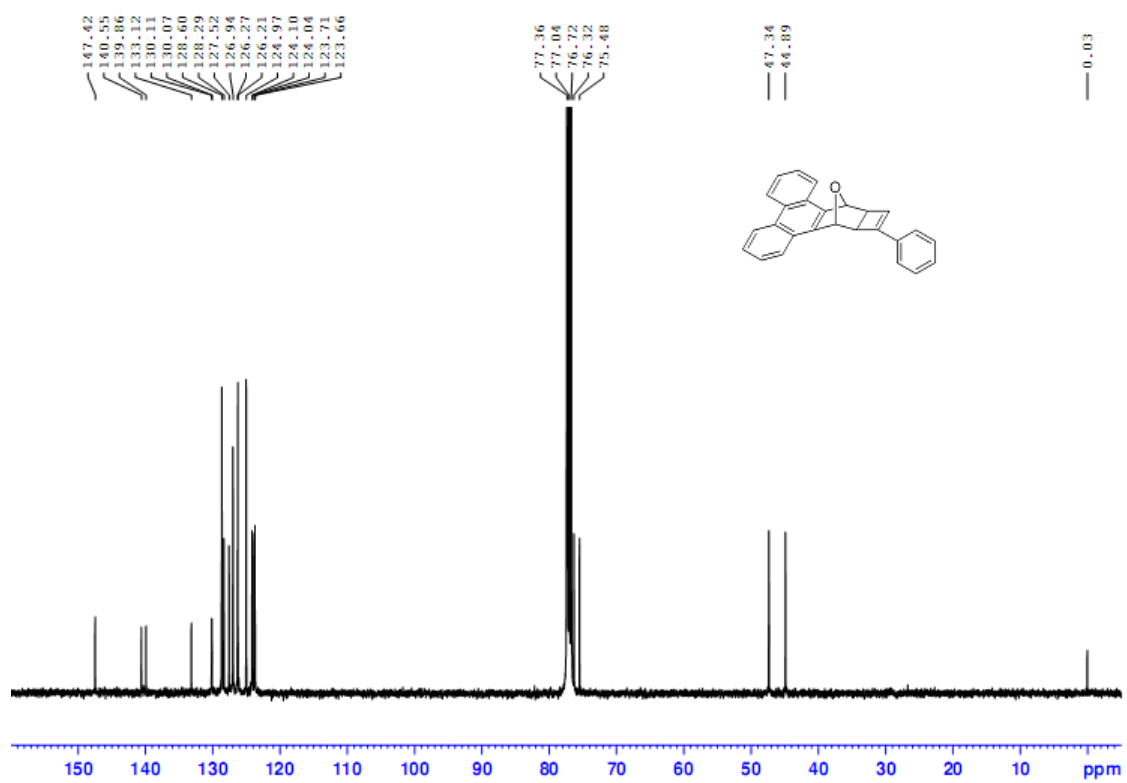

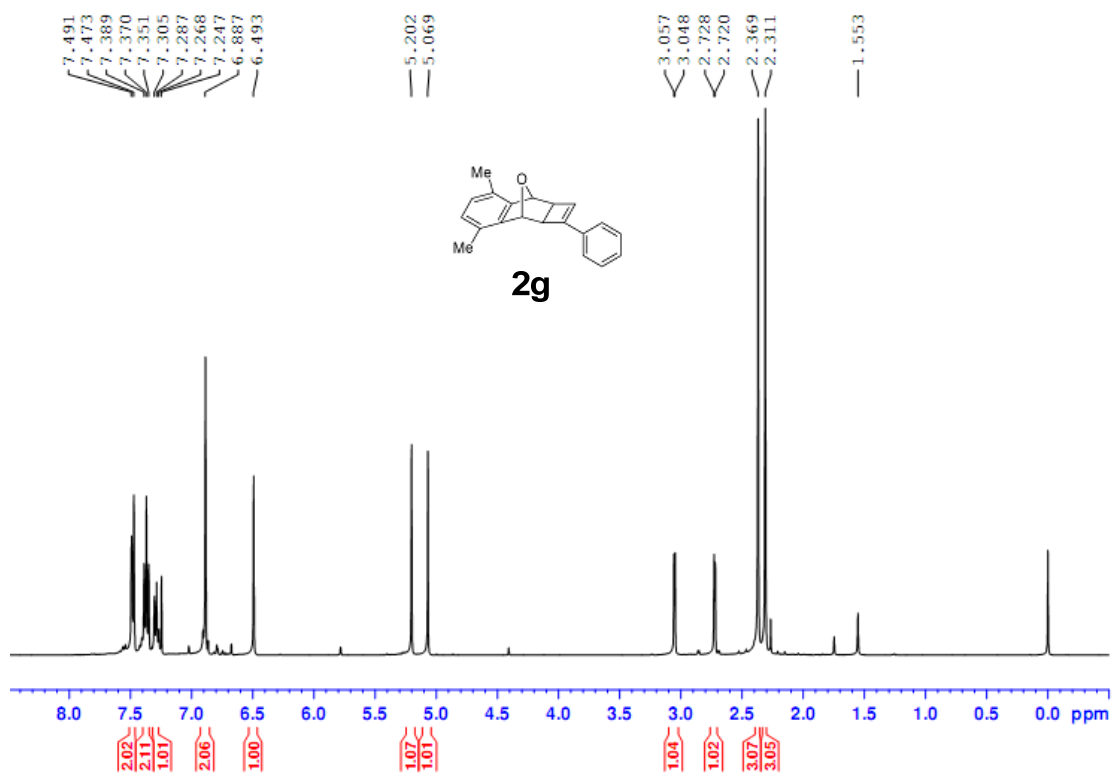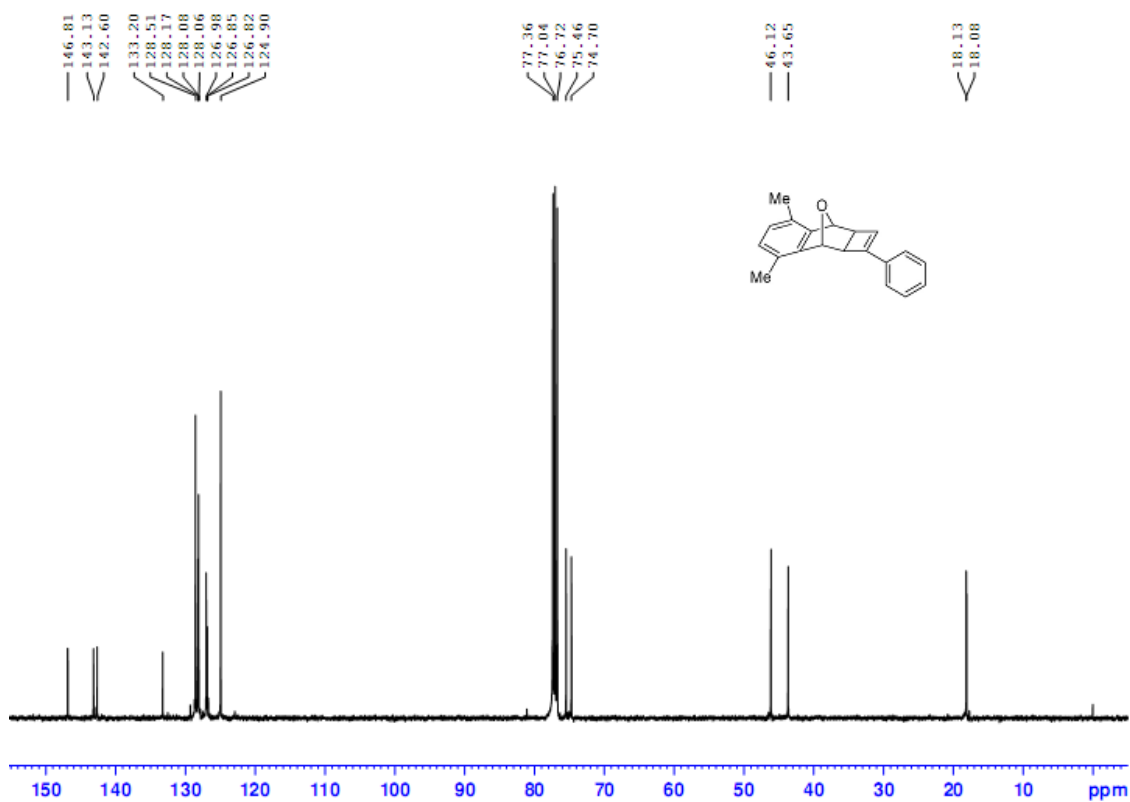

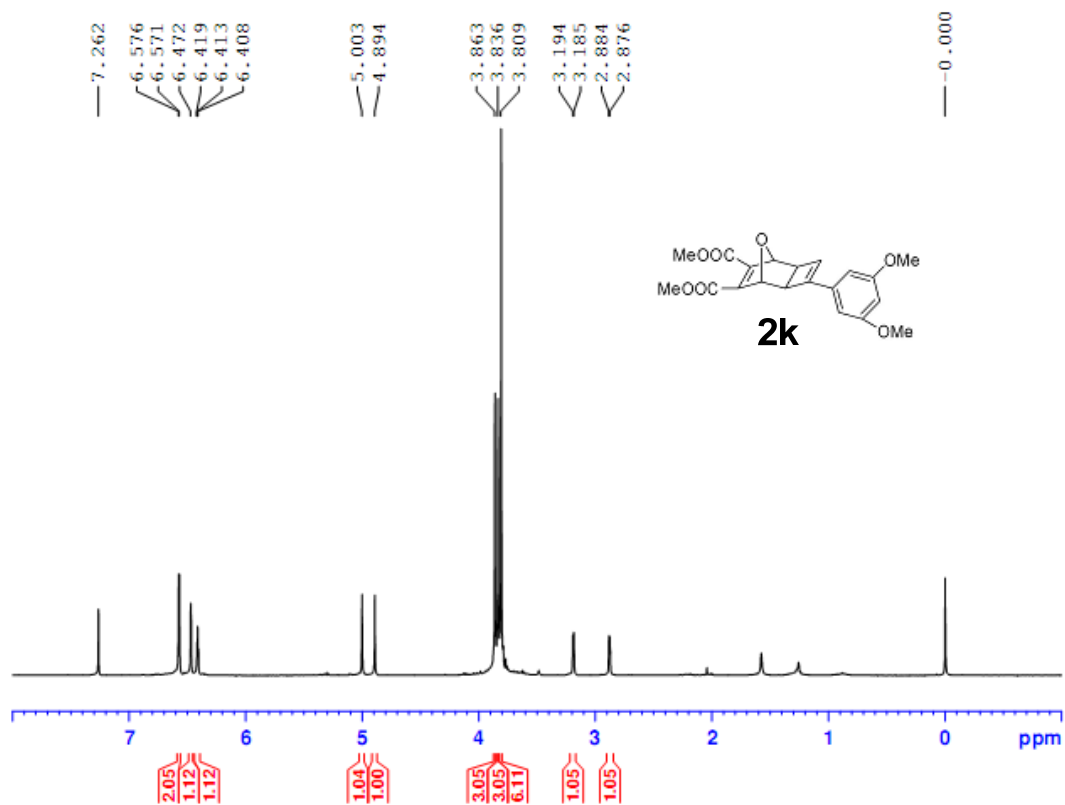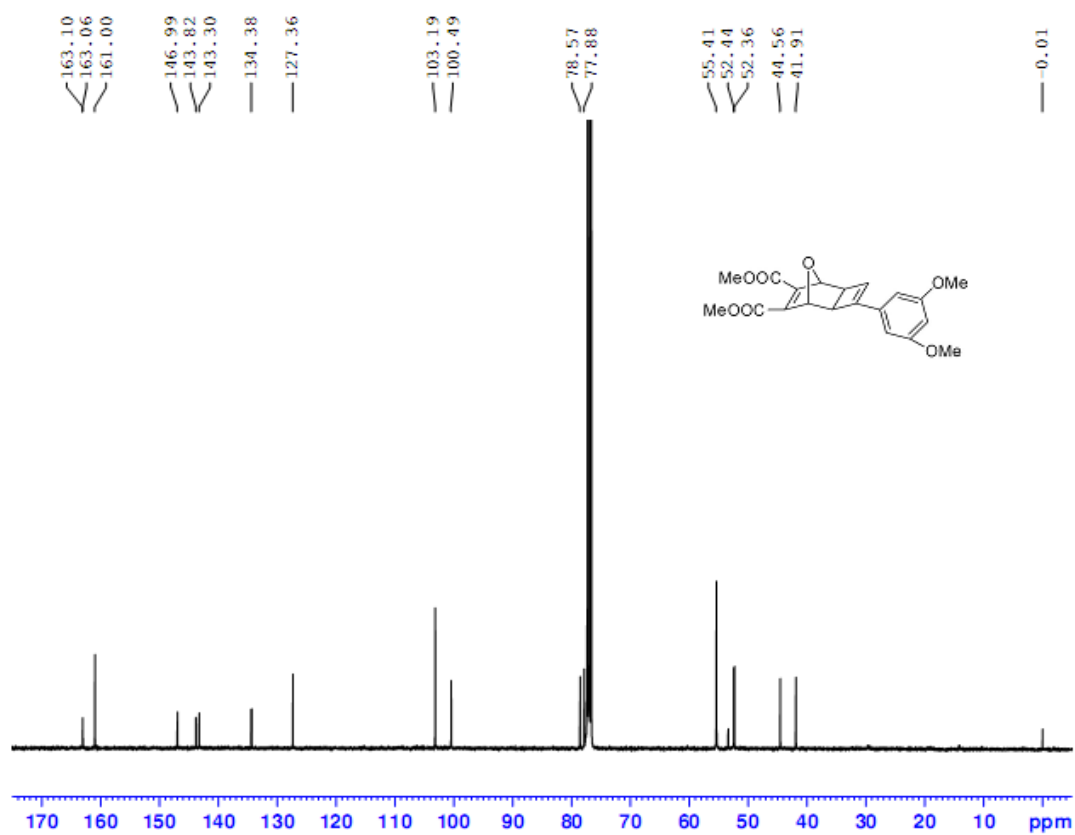



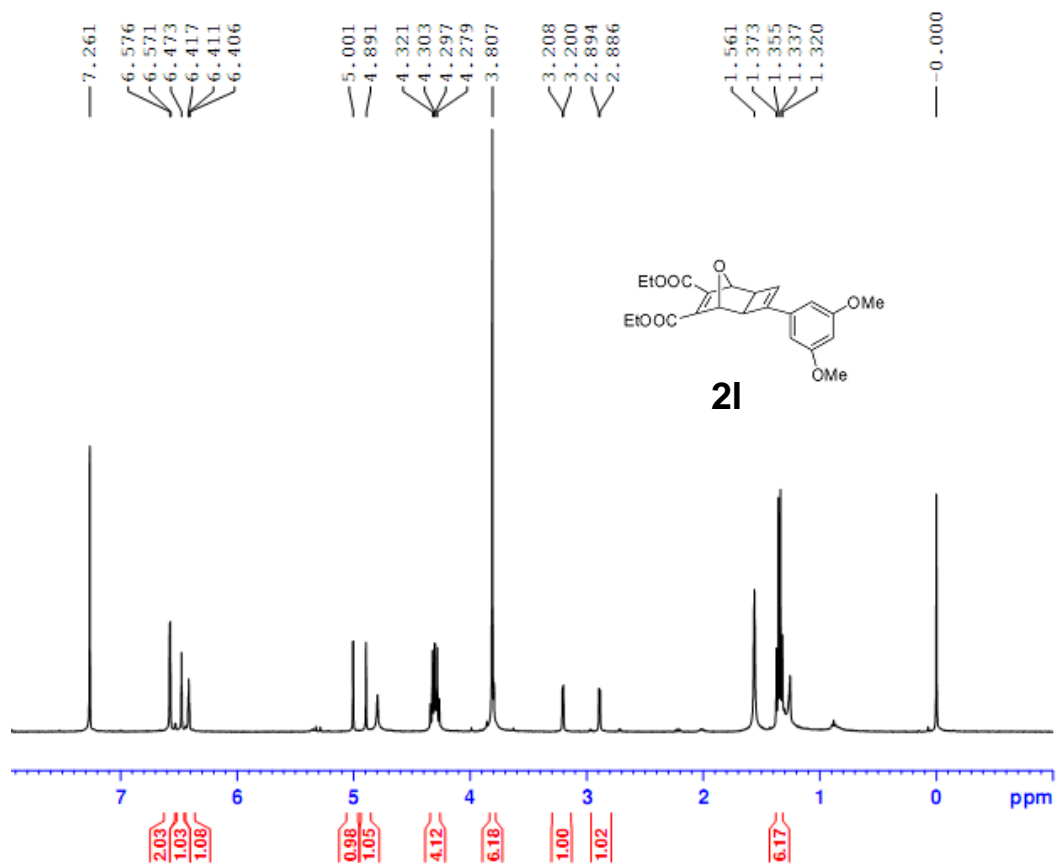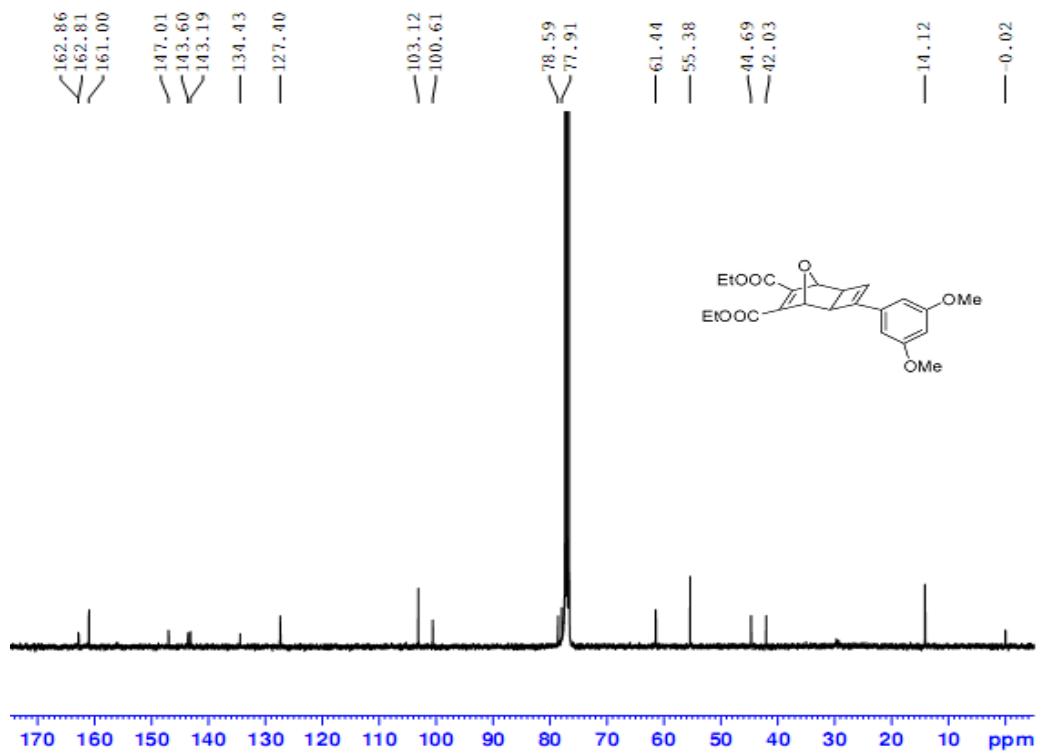

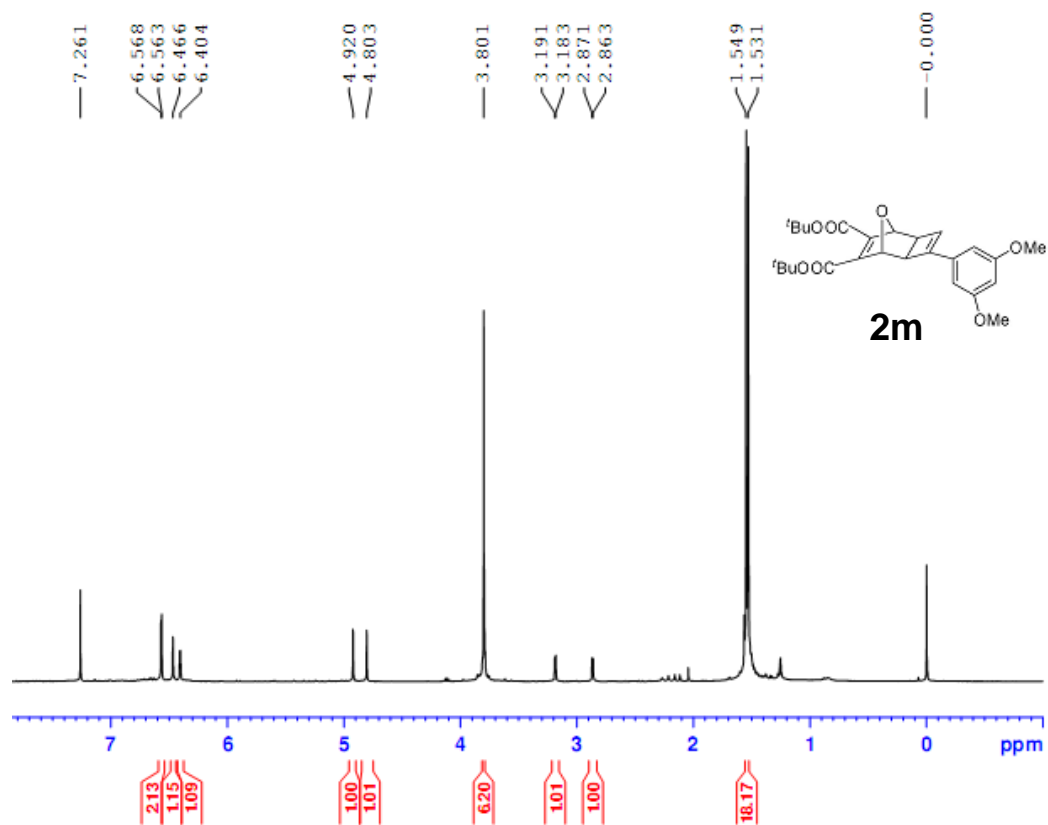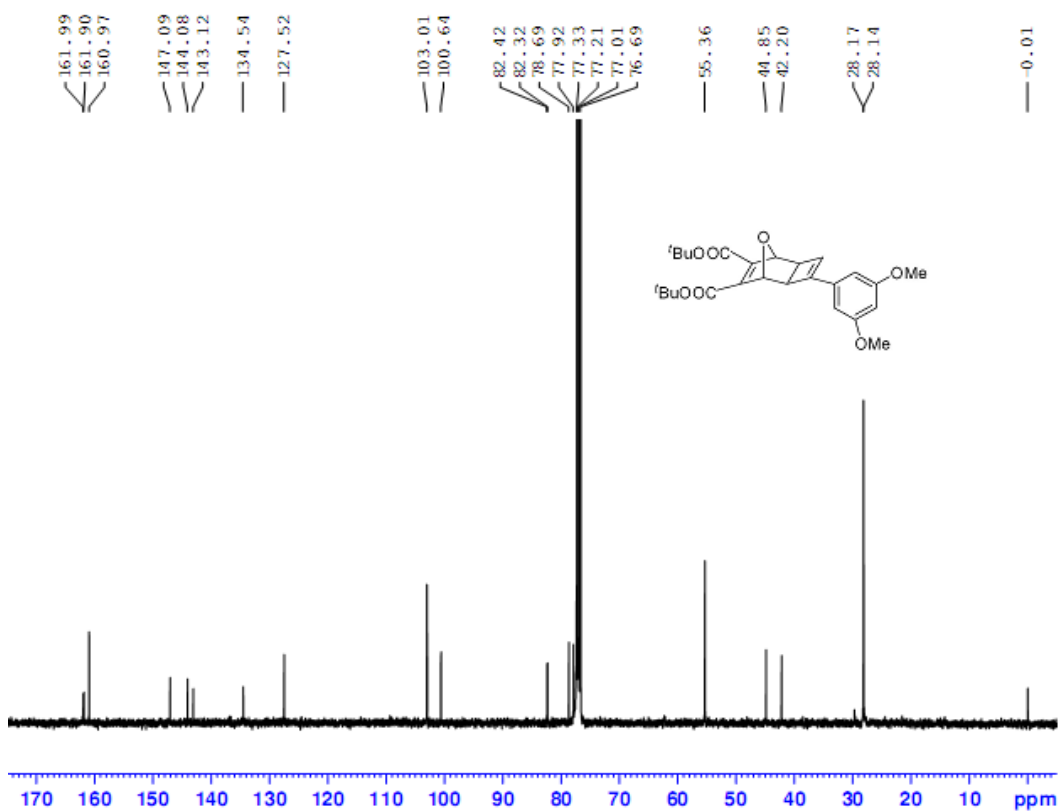

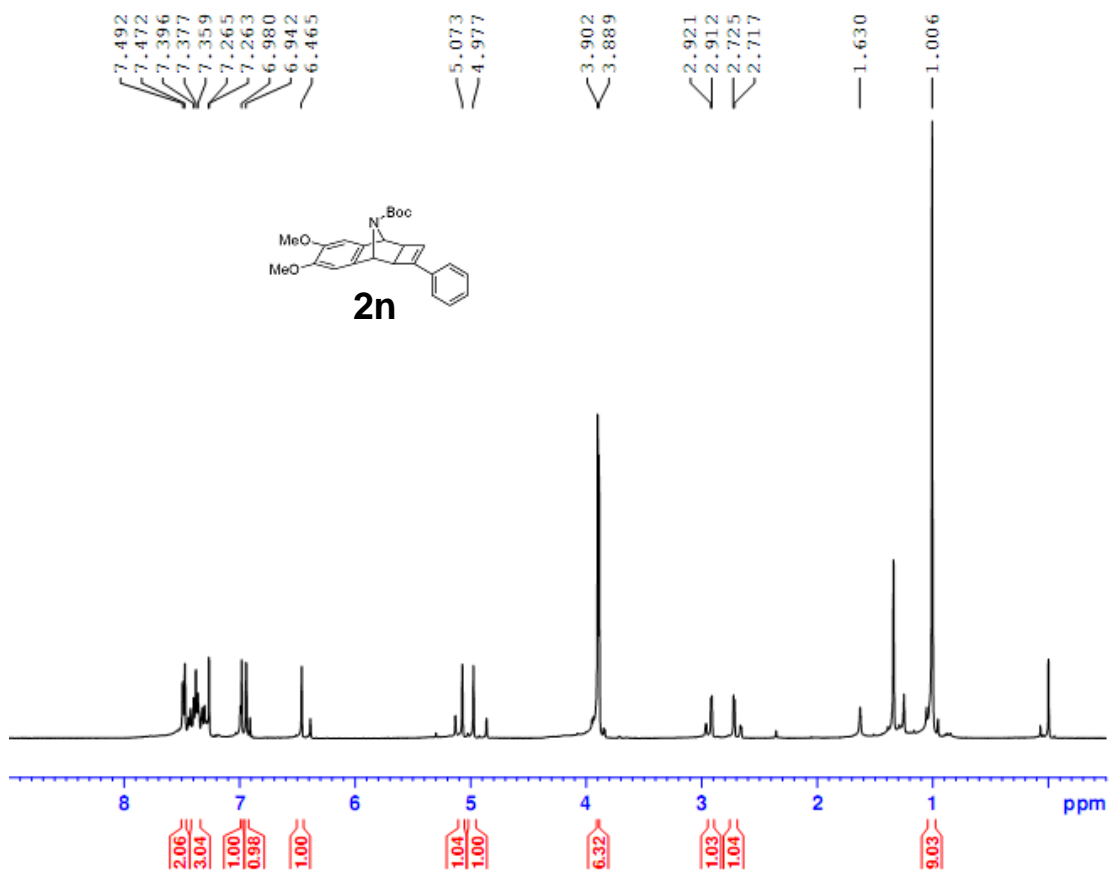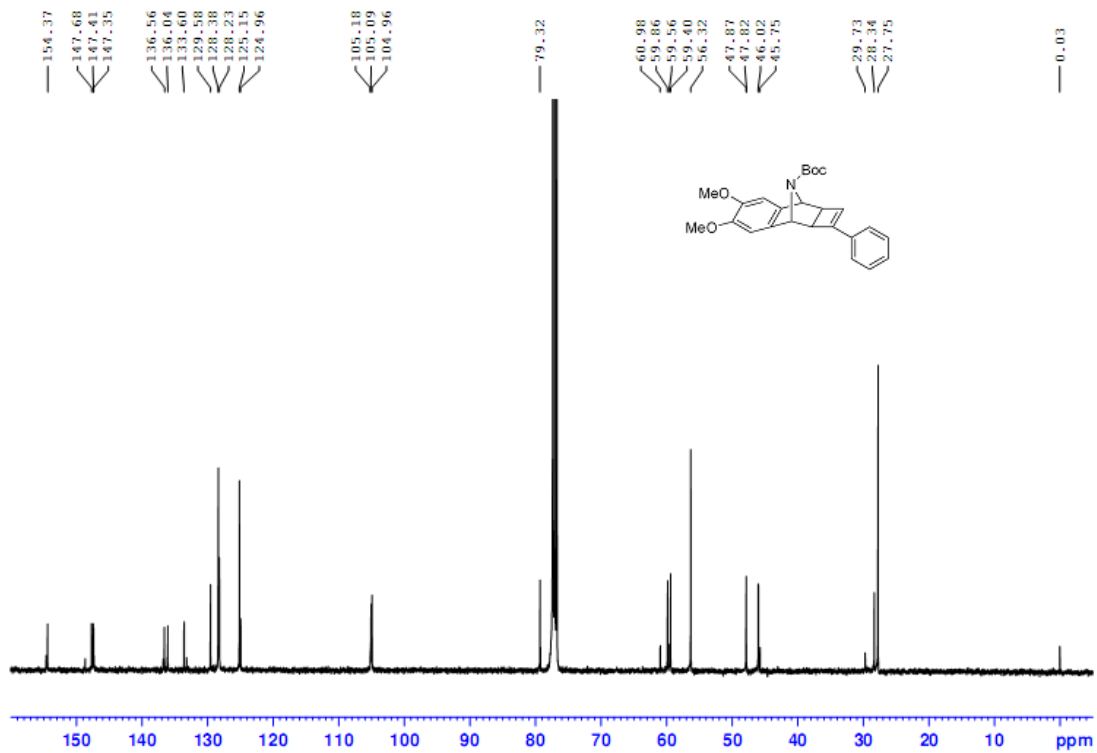

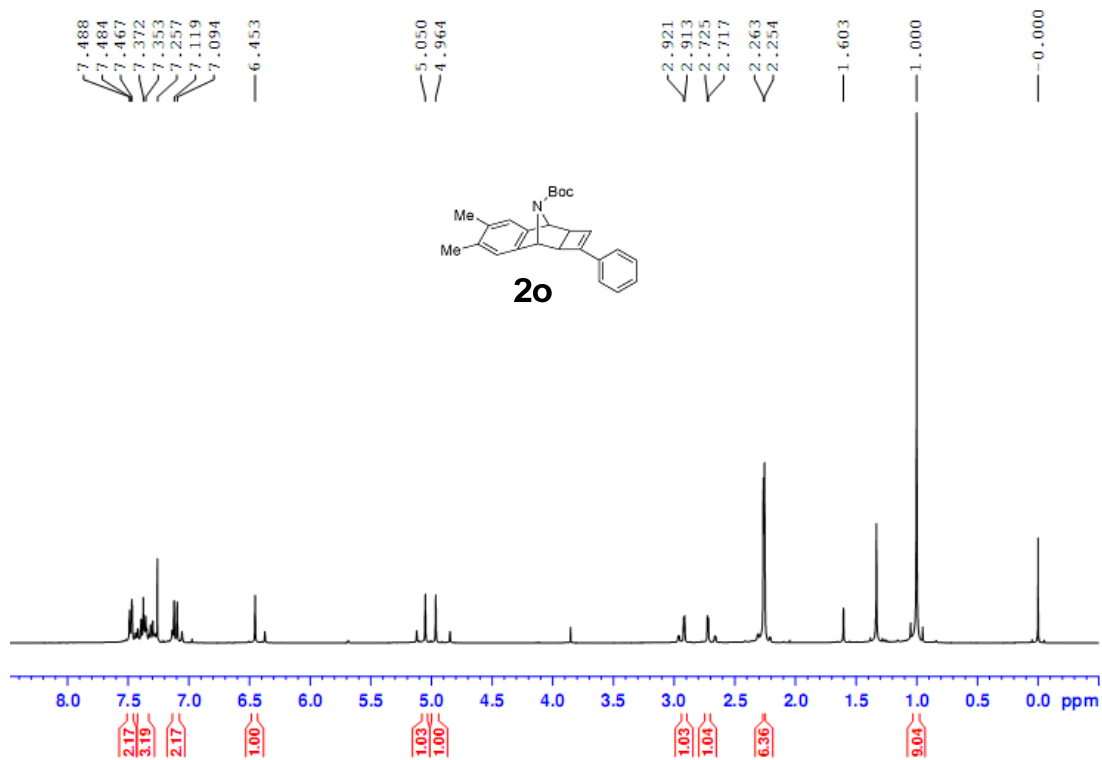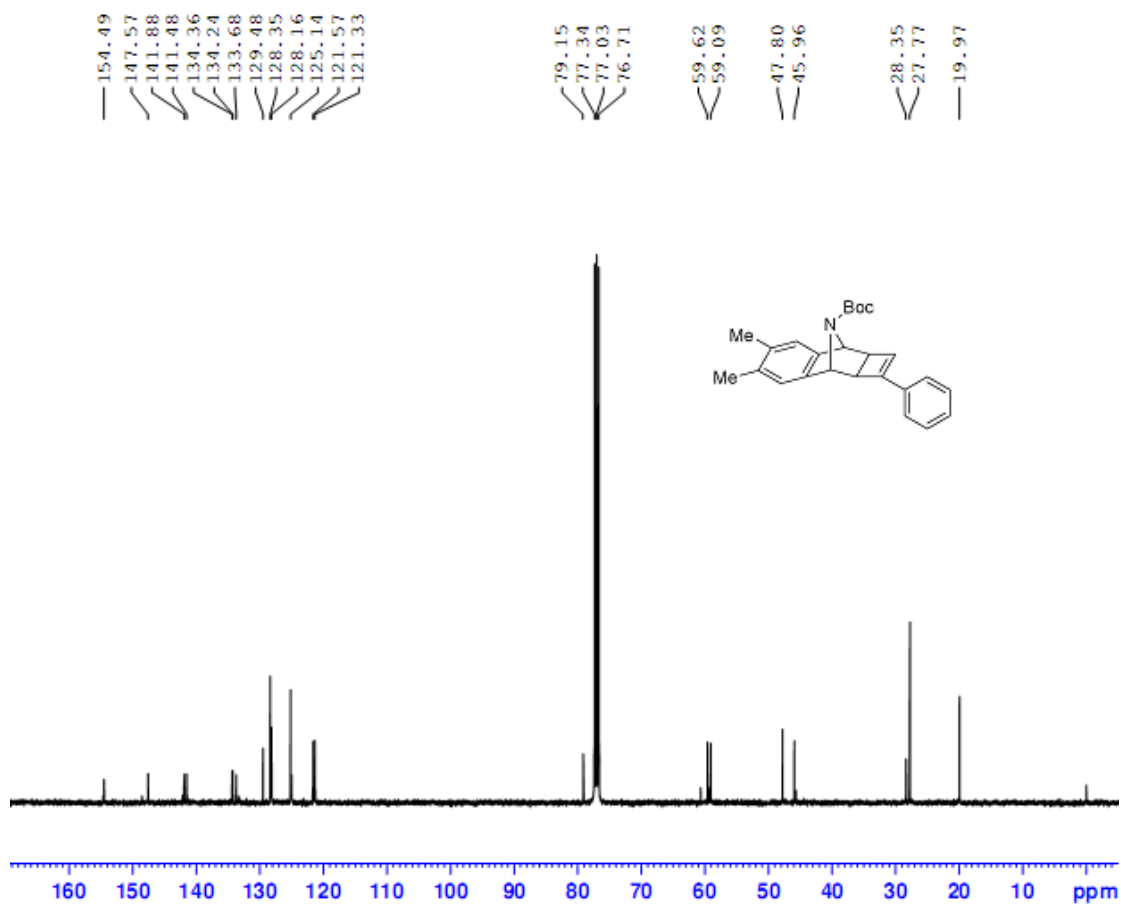

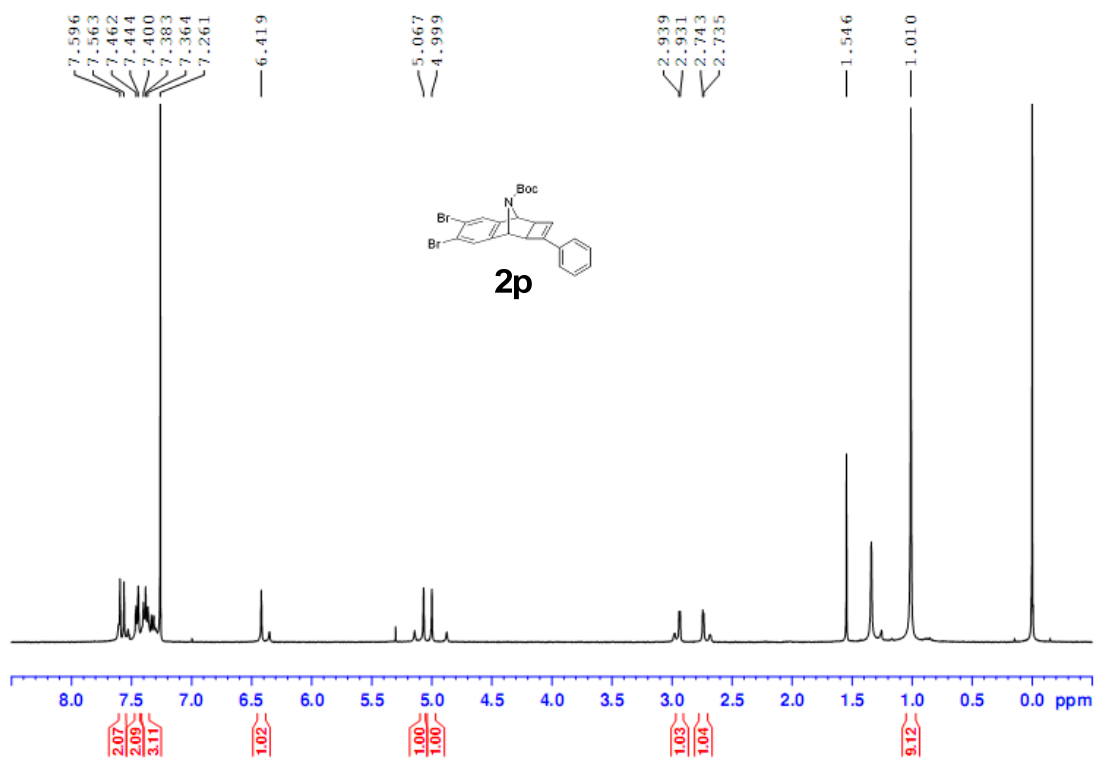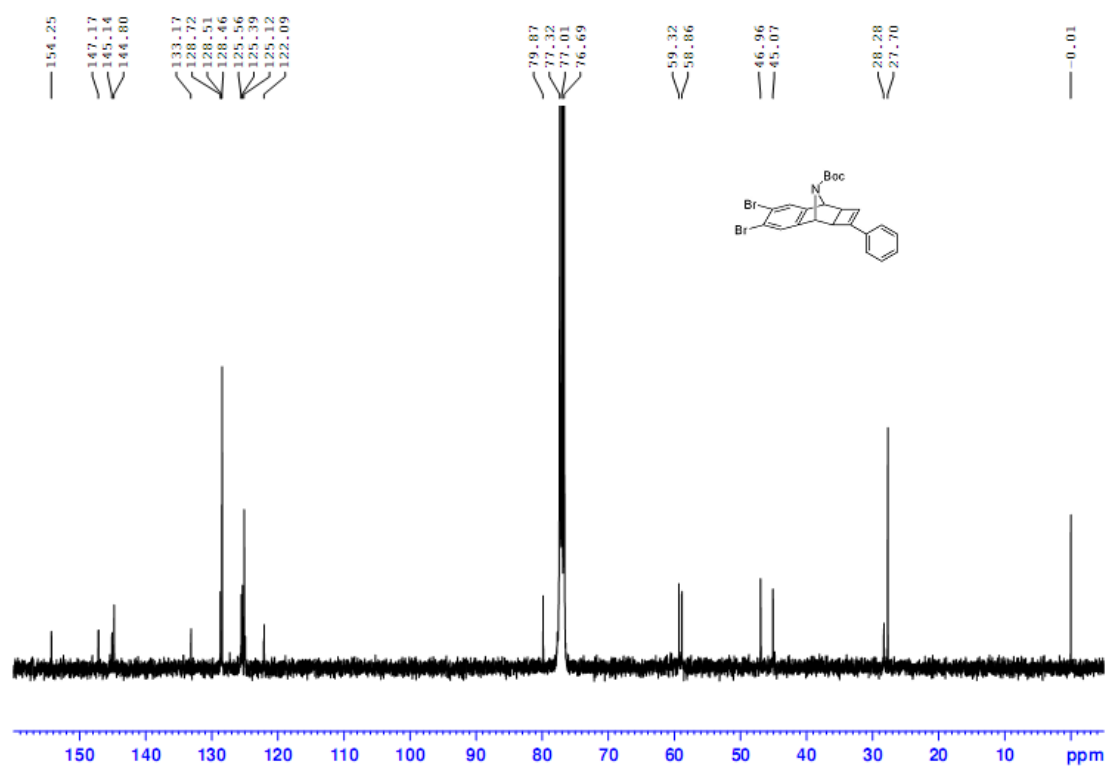

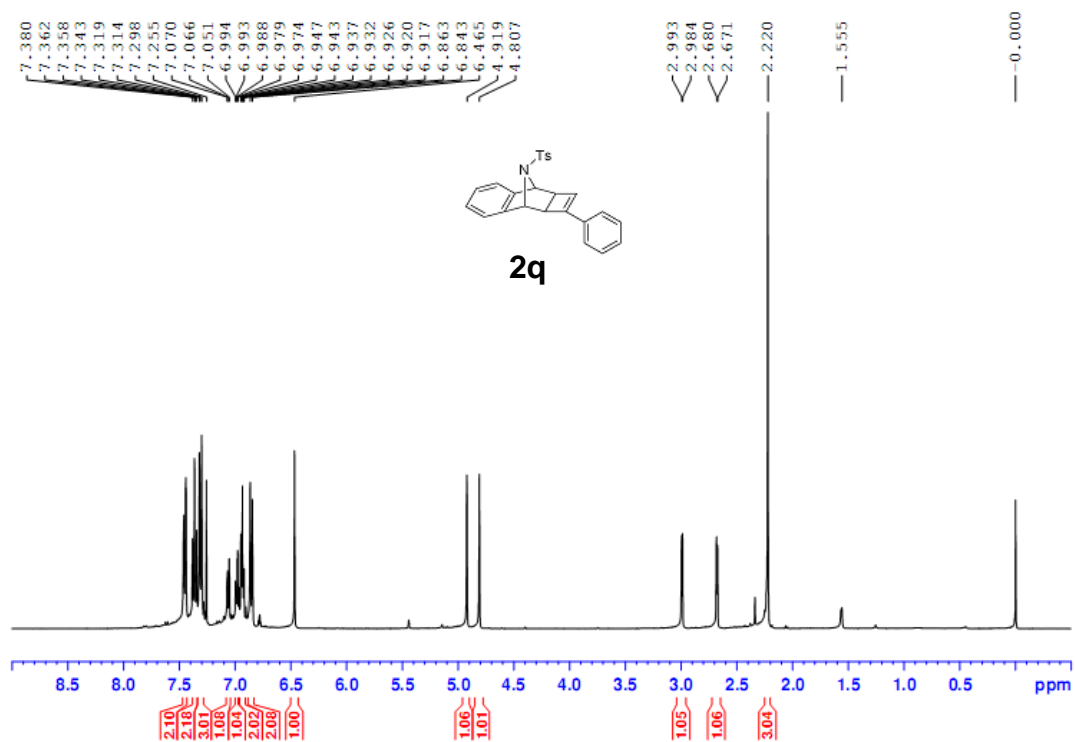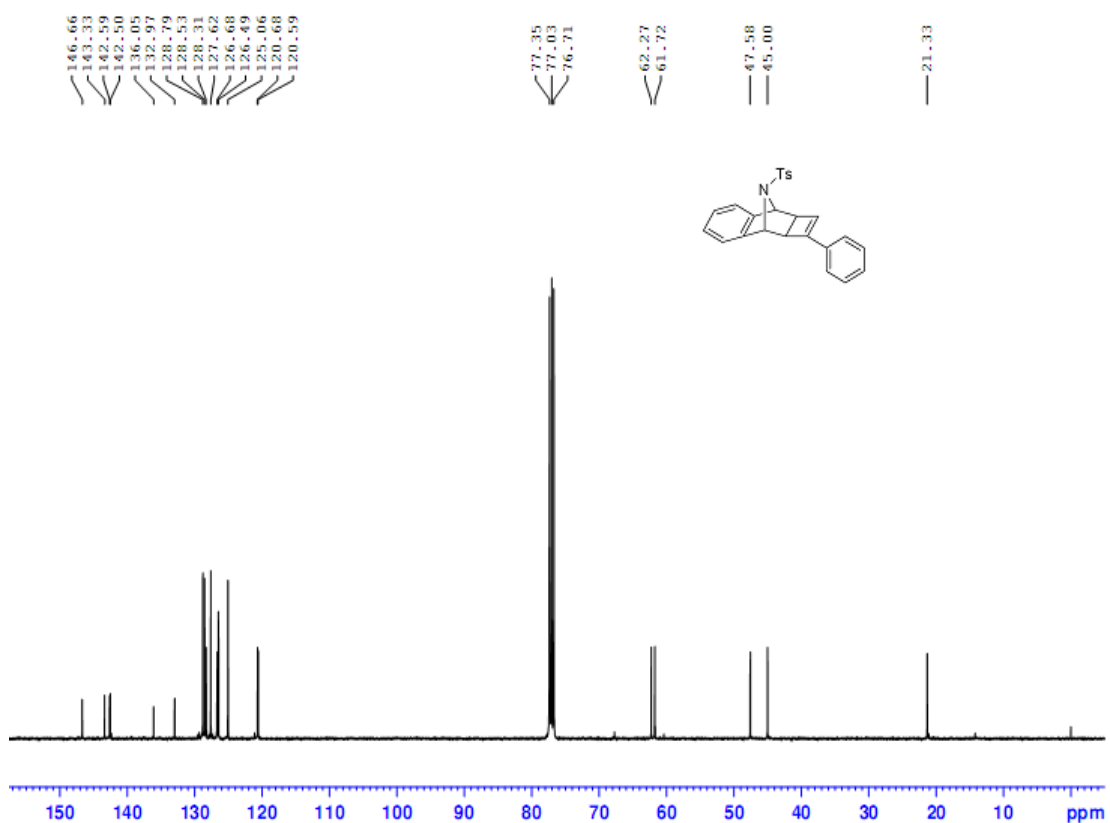

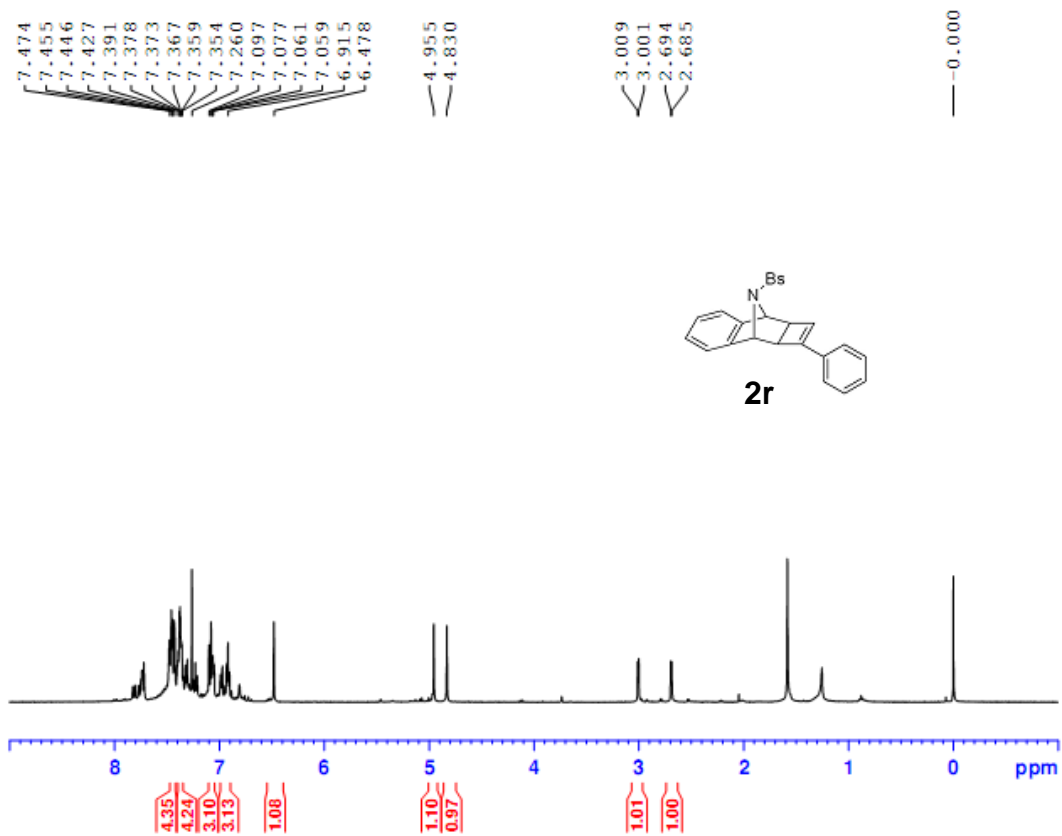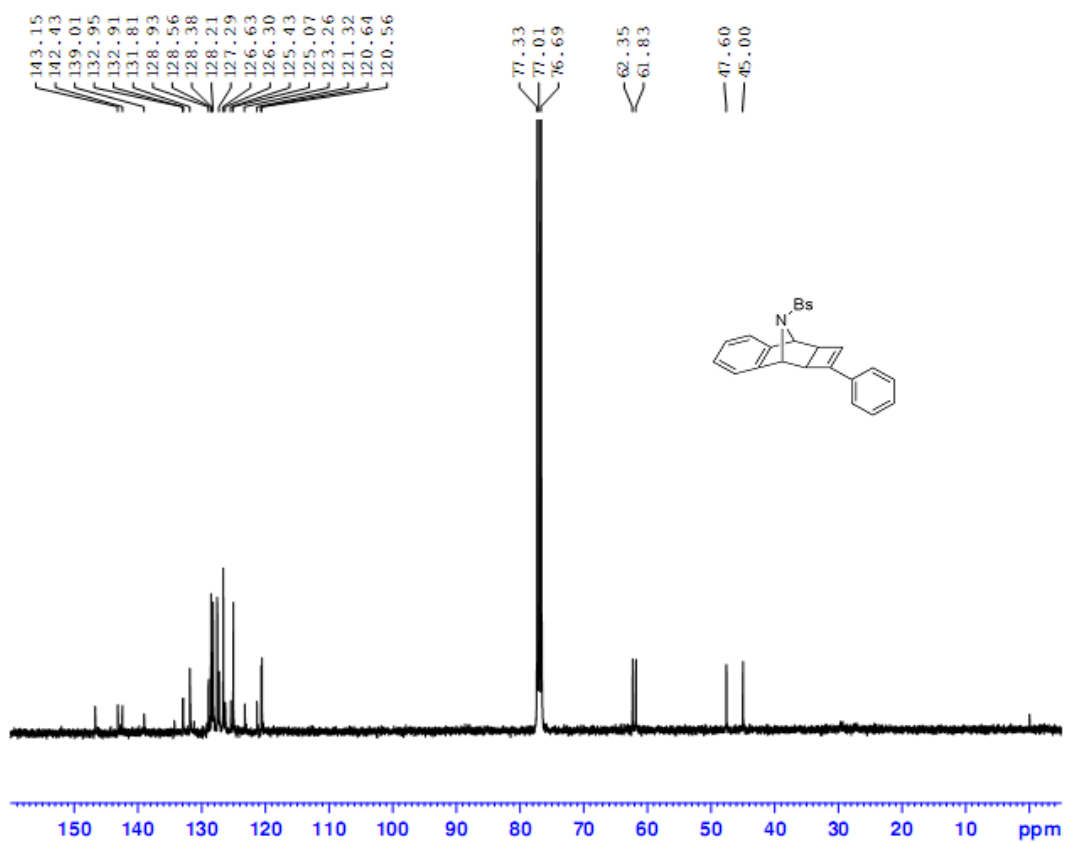

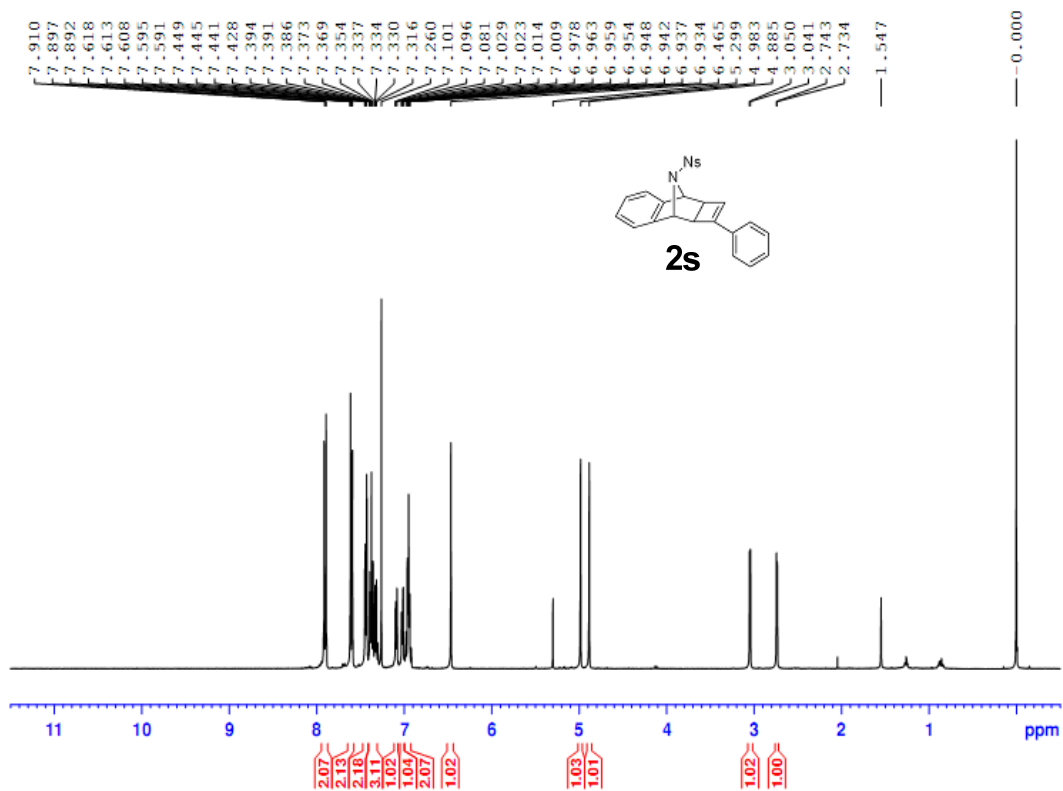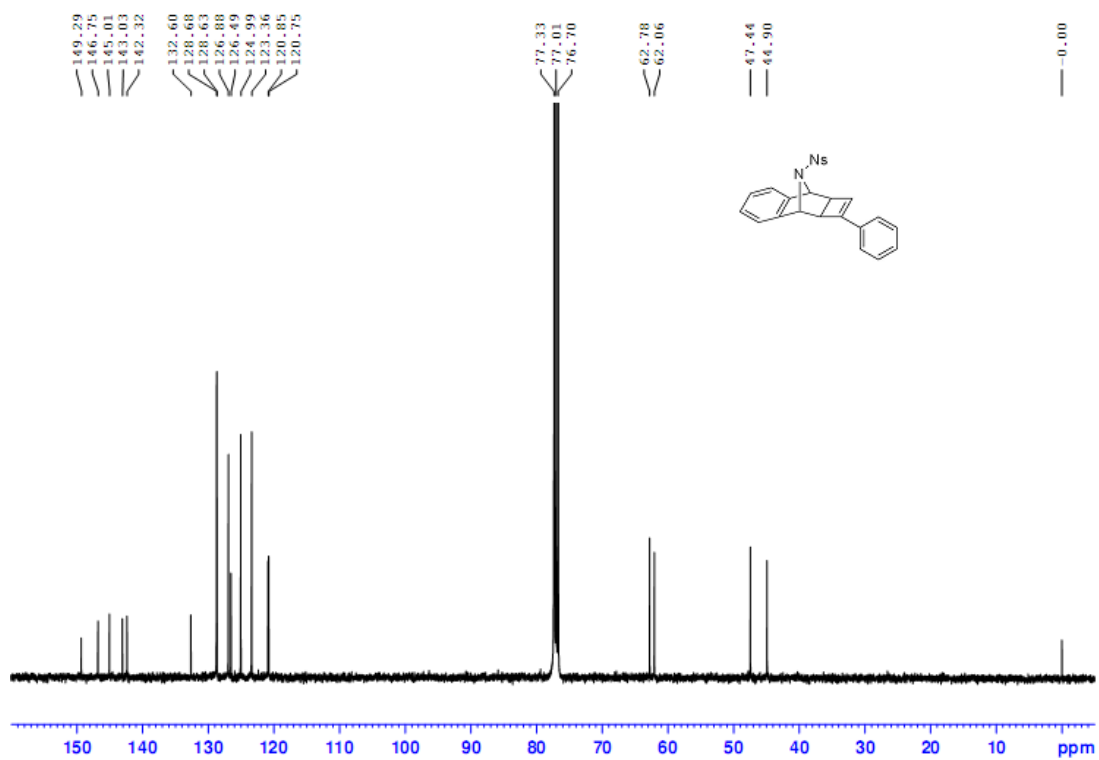



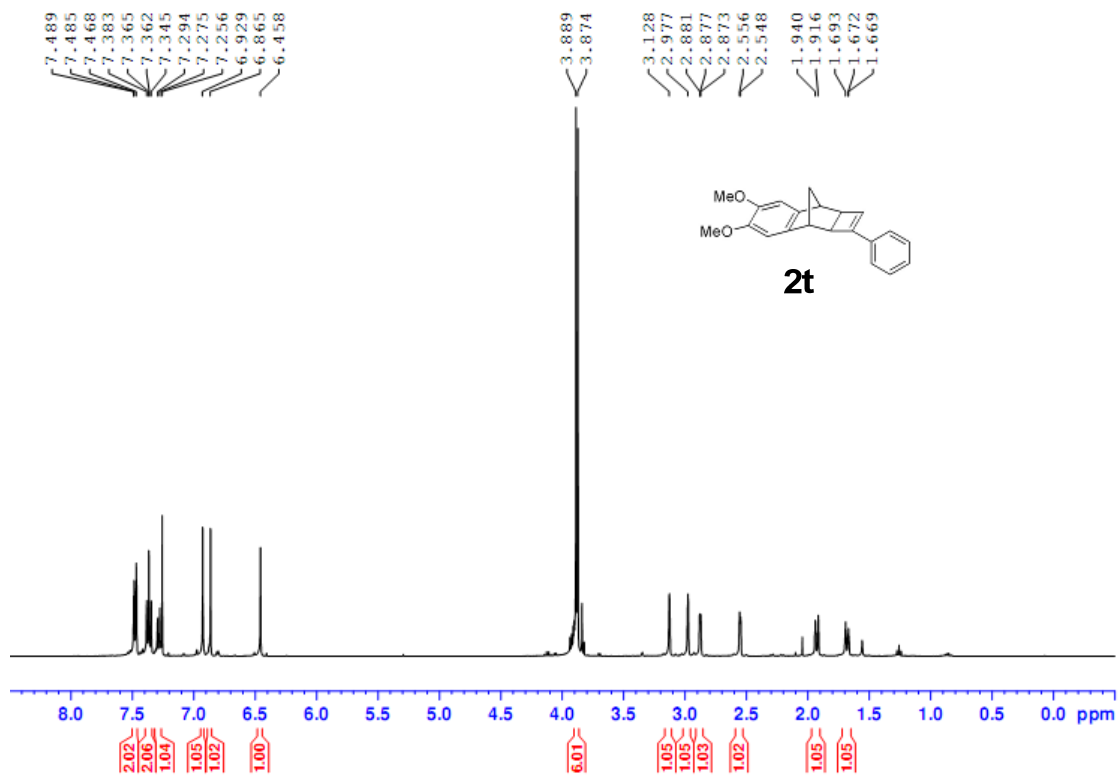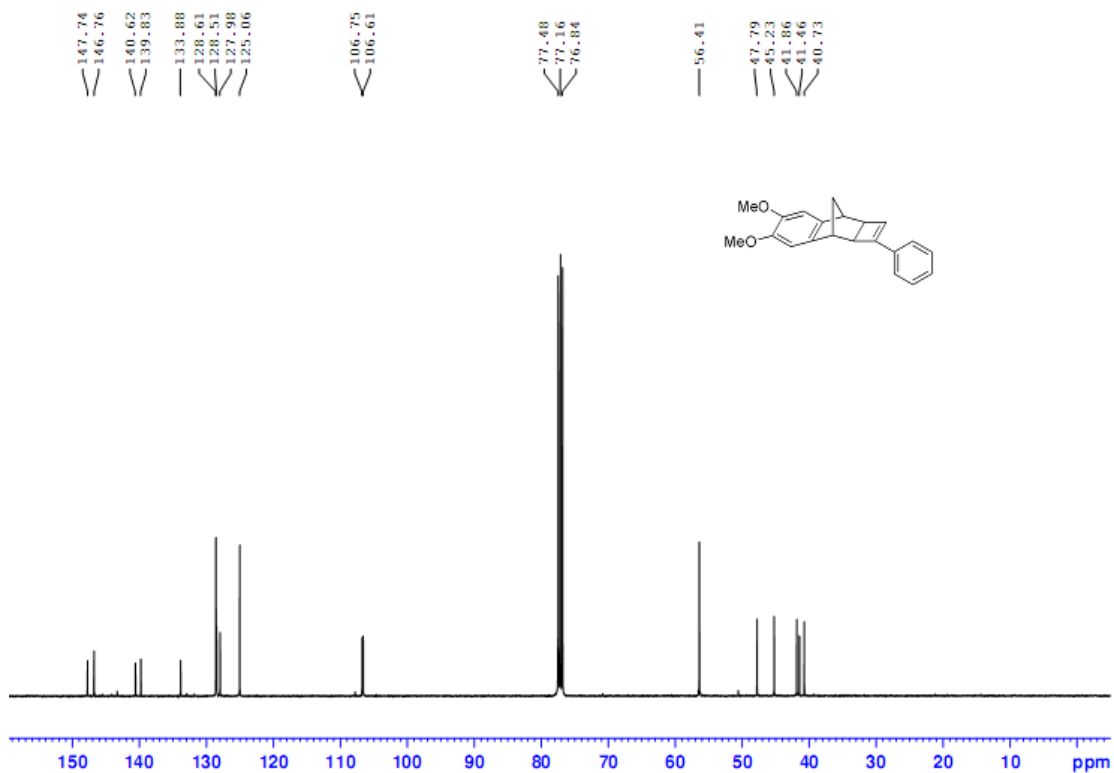

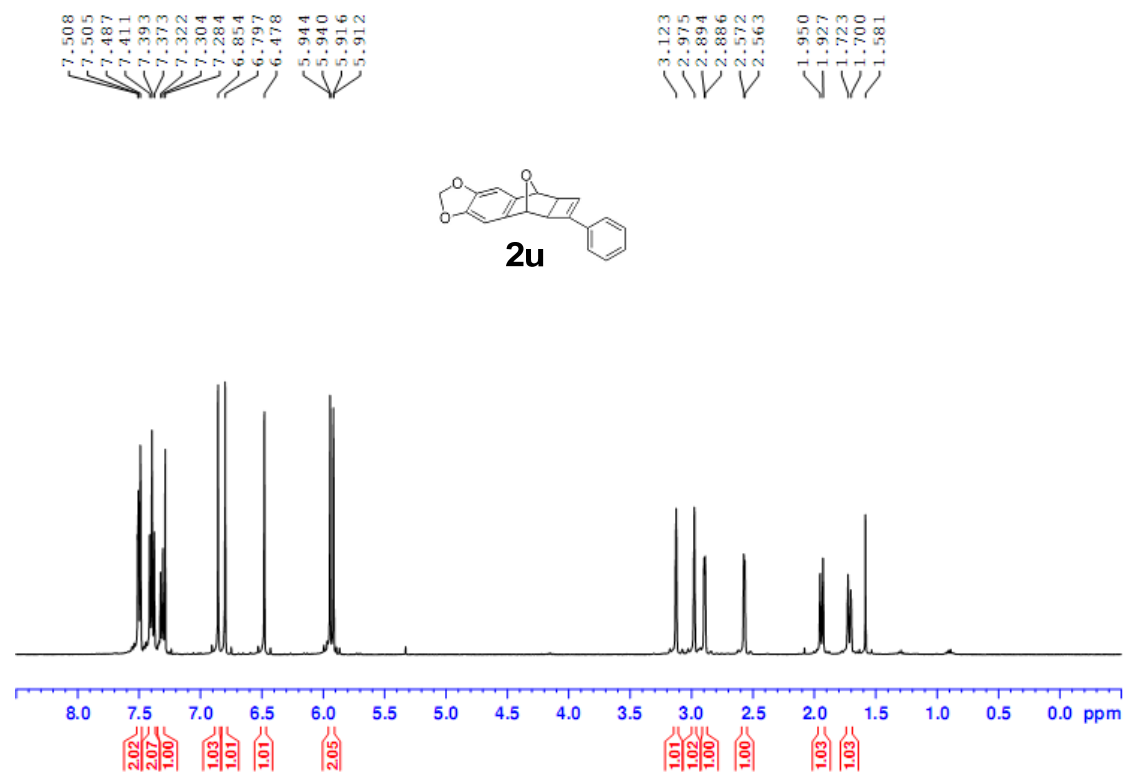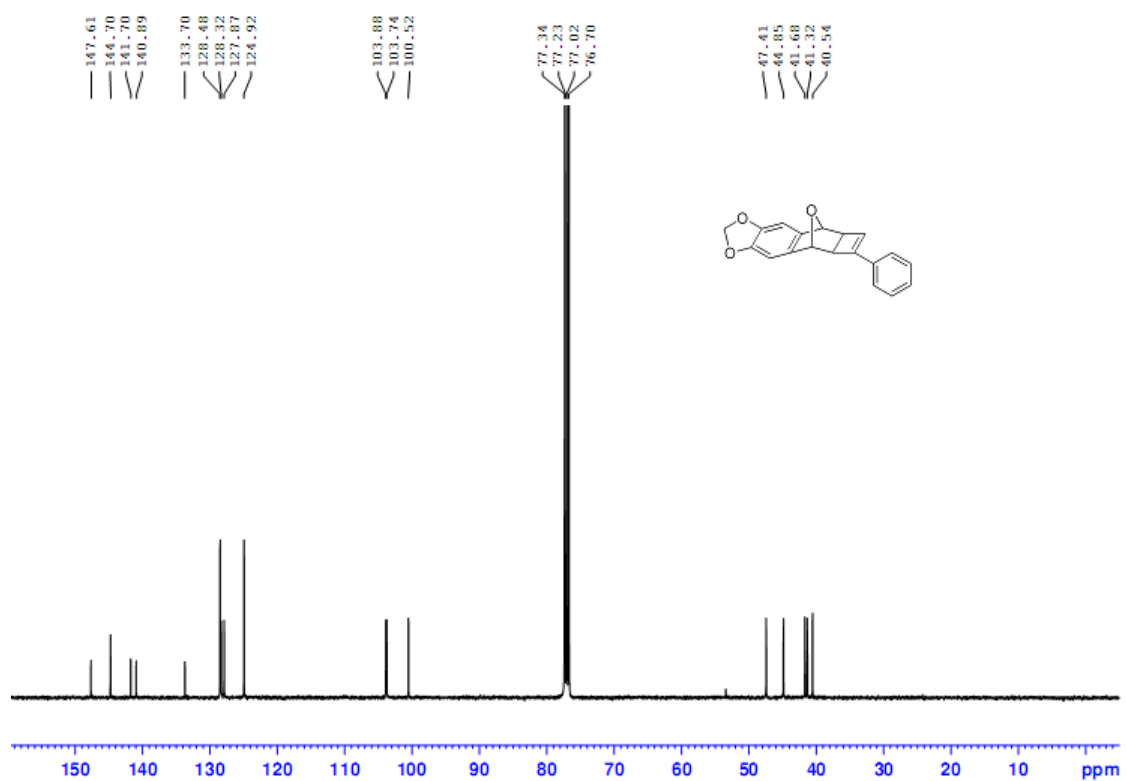

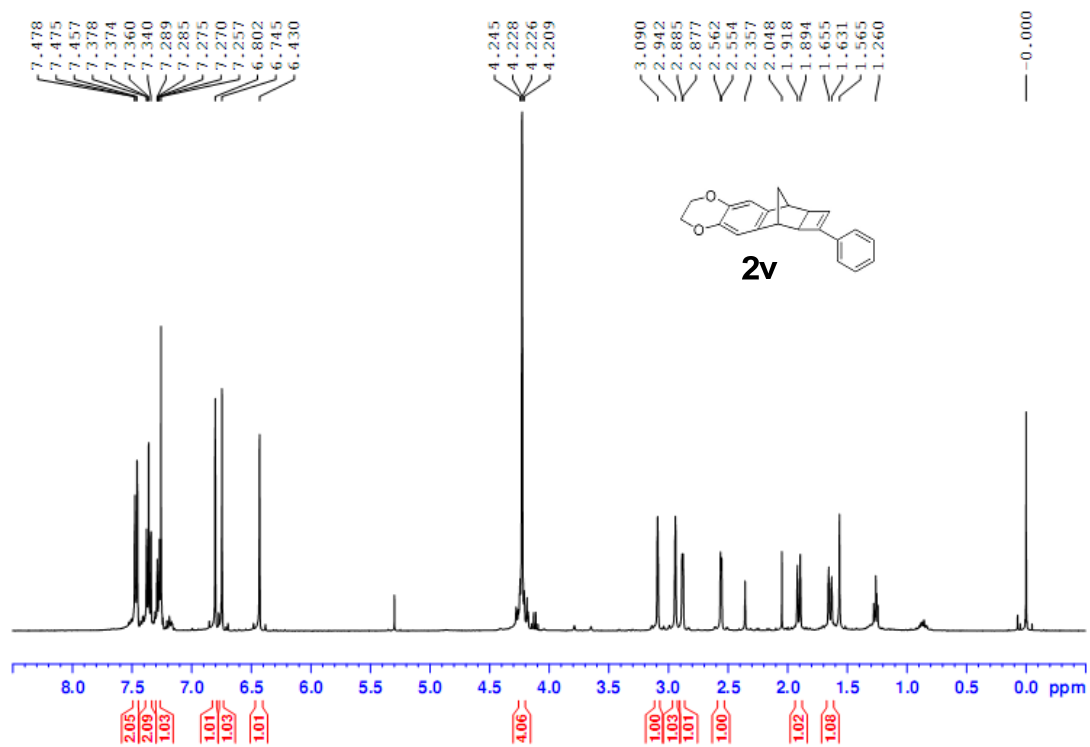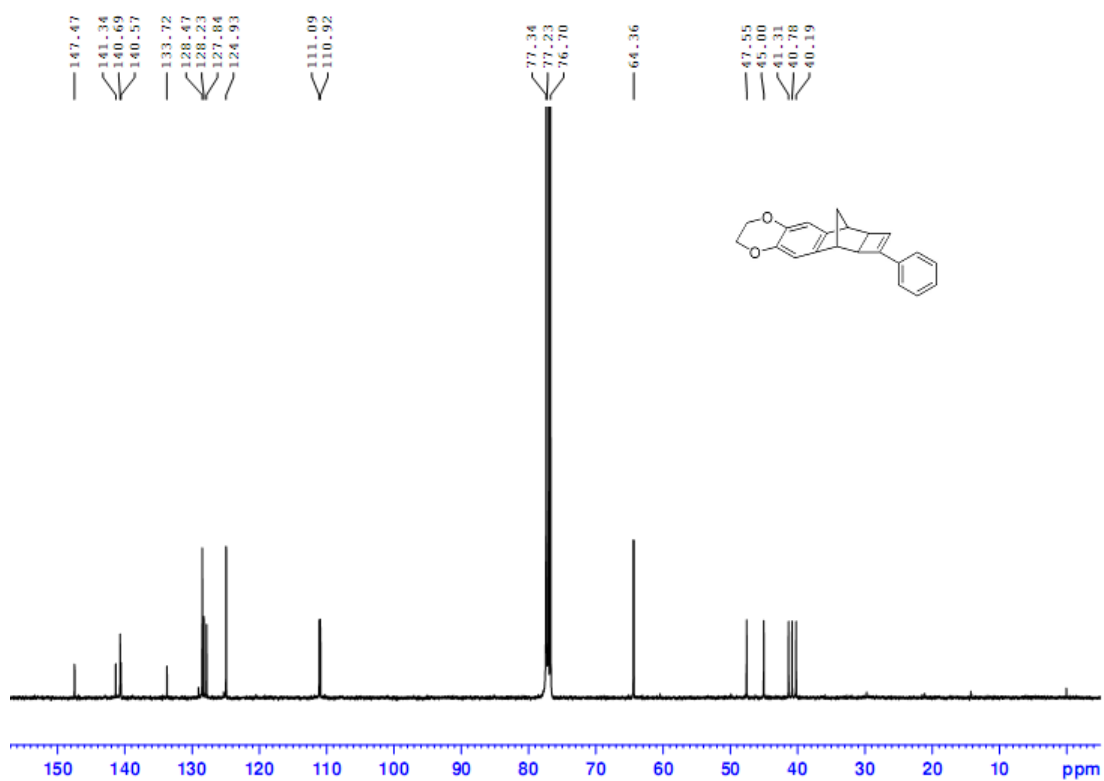

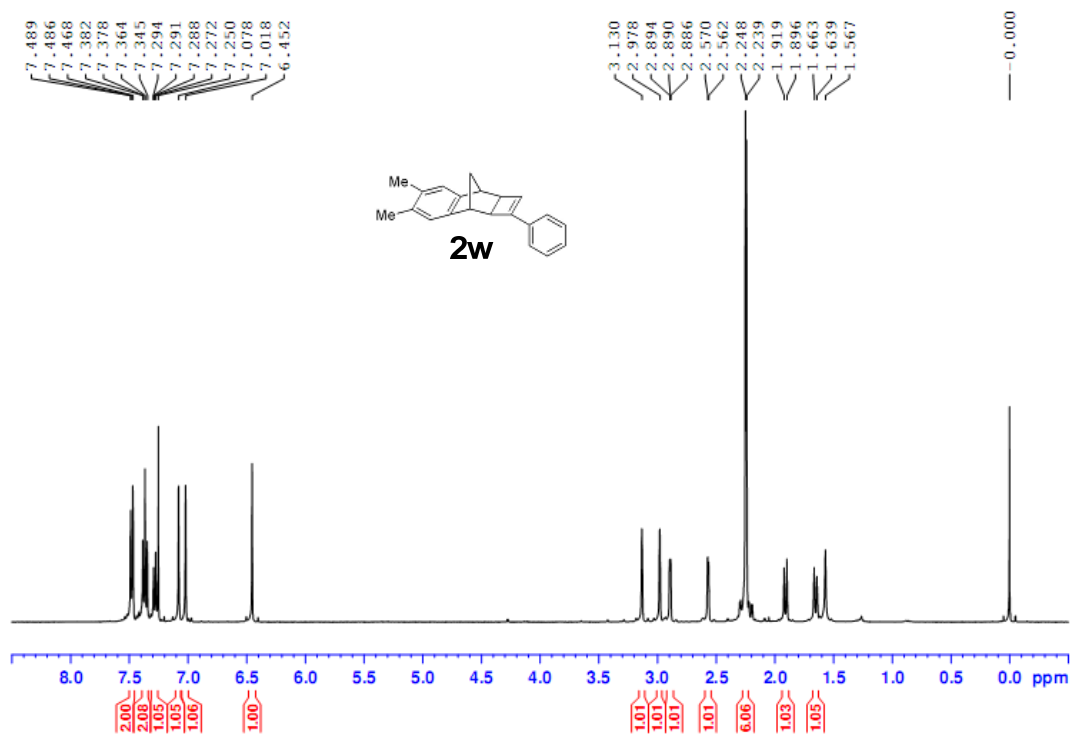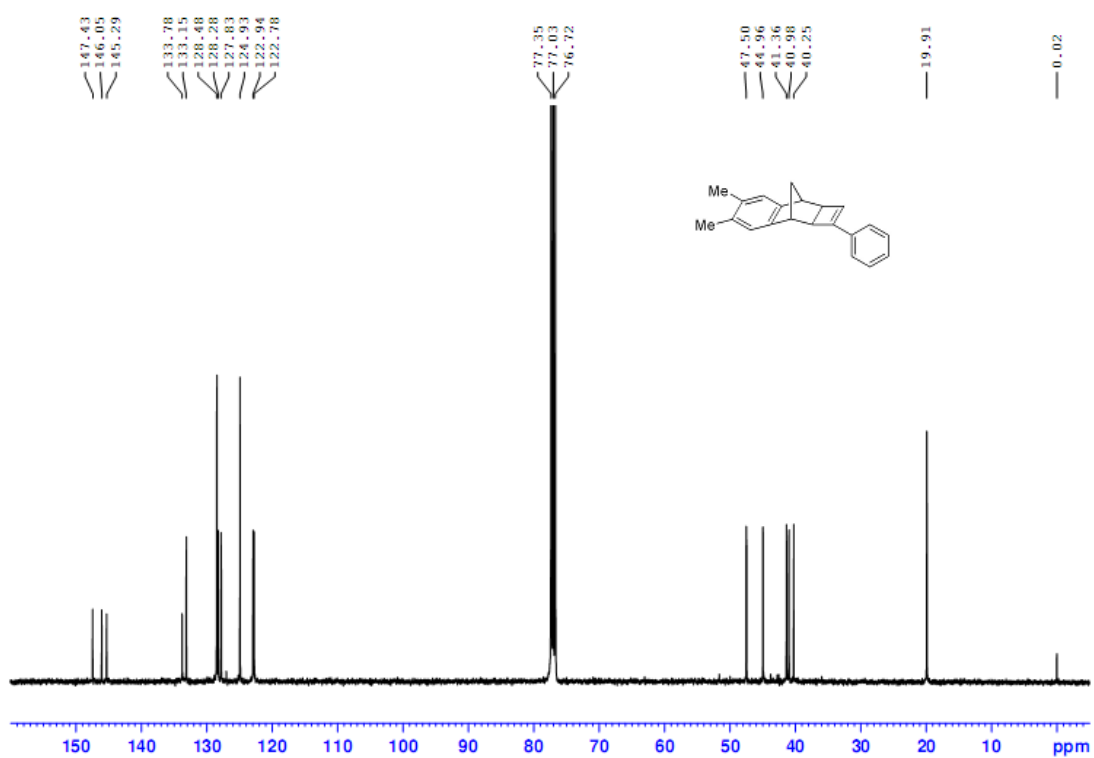

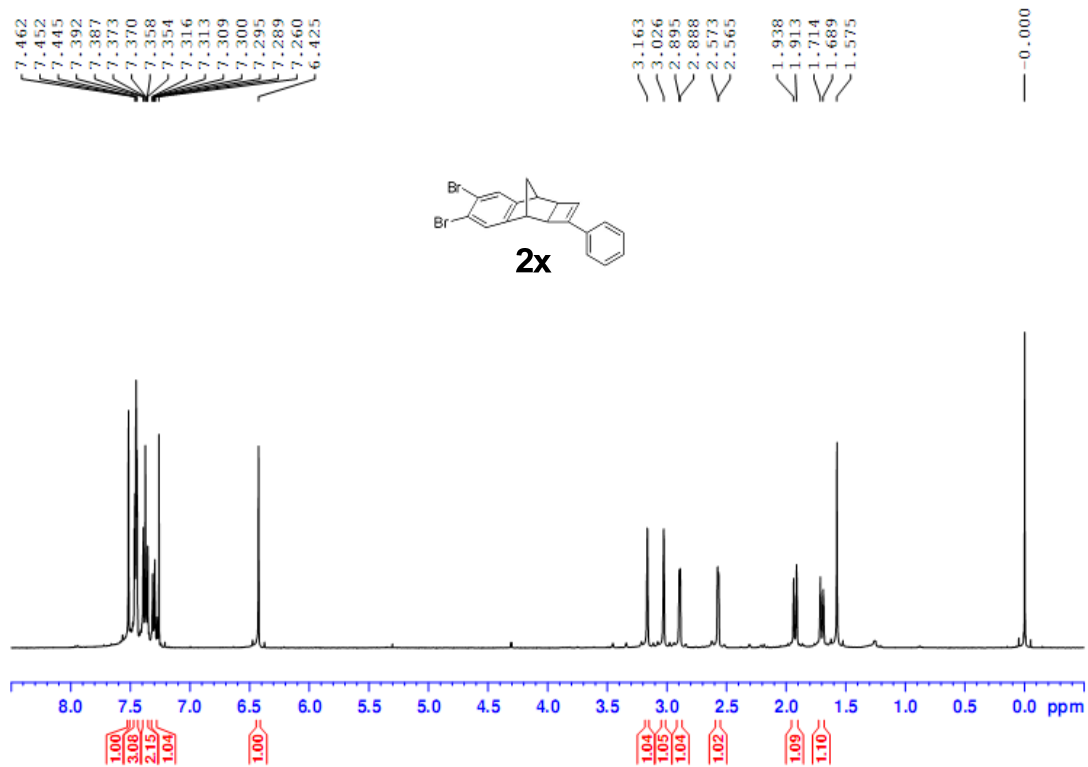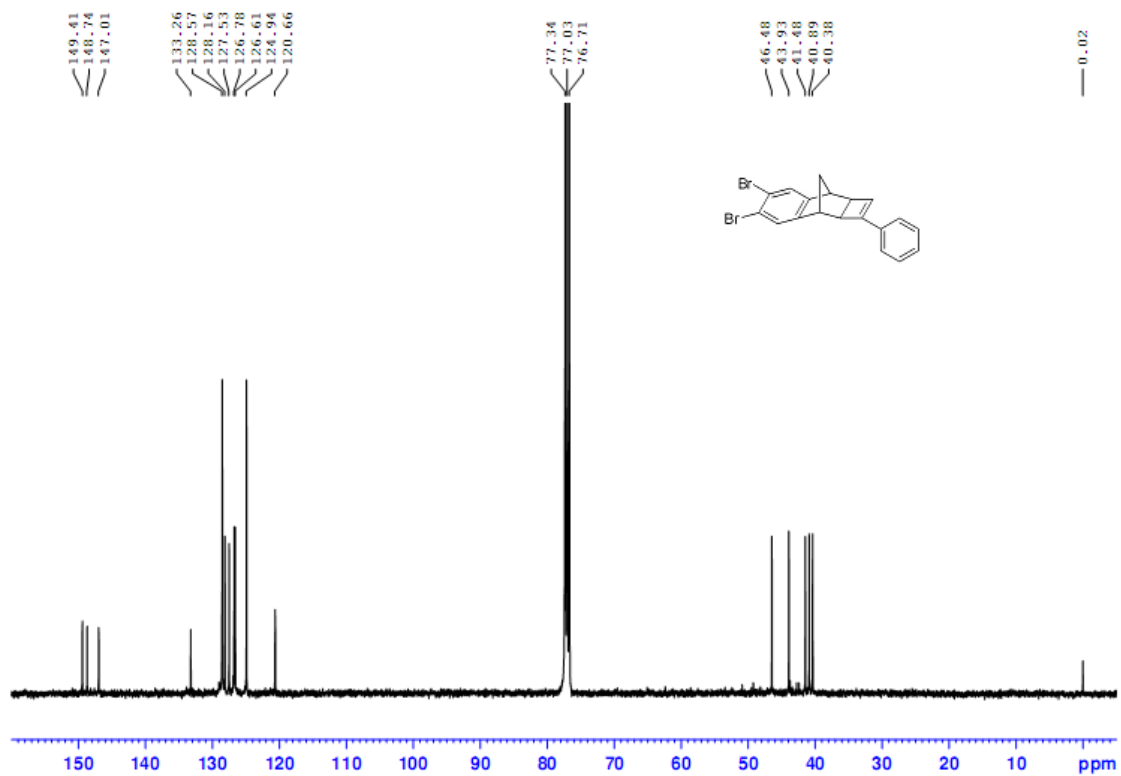

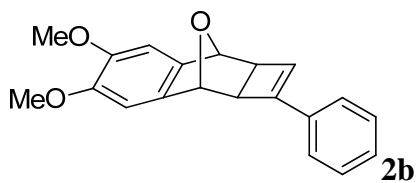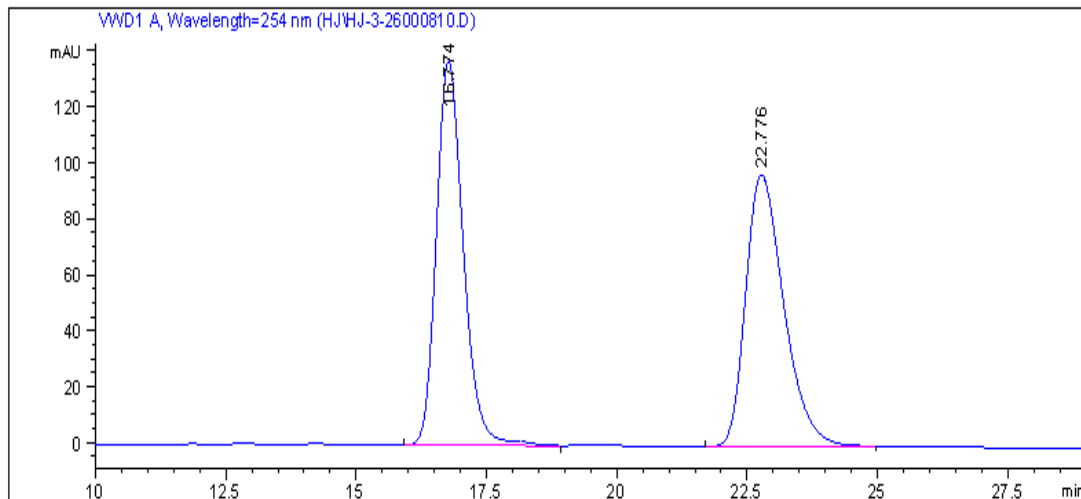

| Peak # | RetTime [min] | Type | Width [min] | Area [mAU*s] | Height [mAU] | Area %  |
|--------|---------------|------|-------------|--------------|--------------|---------|
| 1      | 16.774        | BB   | 0.5553      | 4928.06641   | 137.11552    | 49.9669 |
| 2      | 22.776        | BB   | 0.7793      | 4934.60156   | 97.04229     | 50.0331 |

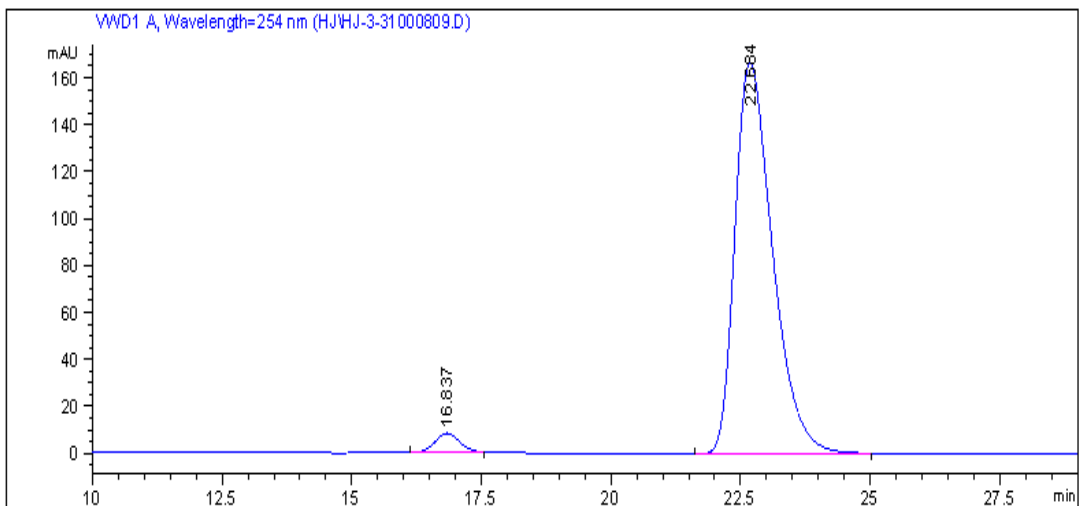

| Peak # | RetTime [min] | Type | Width [min] | Area [mAU*s] | Height [mAU] | Area %  |
|--------|---------------|------|-------------|--------------|--------------|---------|
| 1      | 16.837        | BBA  | 0.5075      | 264.38376    | 8.08415      | 3.0494  |
| 2      | 22.684        | BBA  | 0.7702      | 8405.65918   | 166.72220    | 96.9506 |

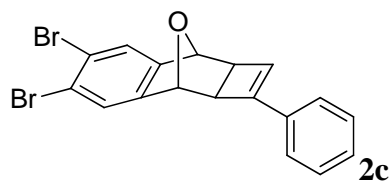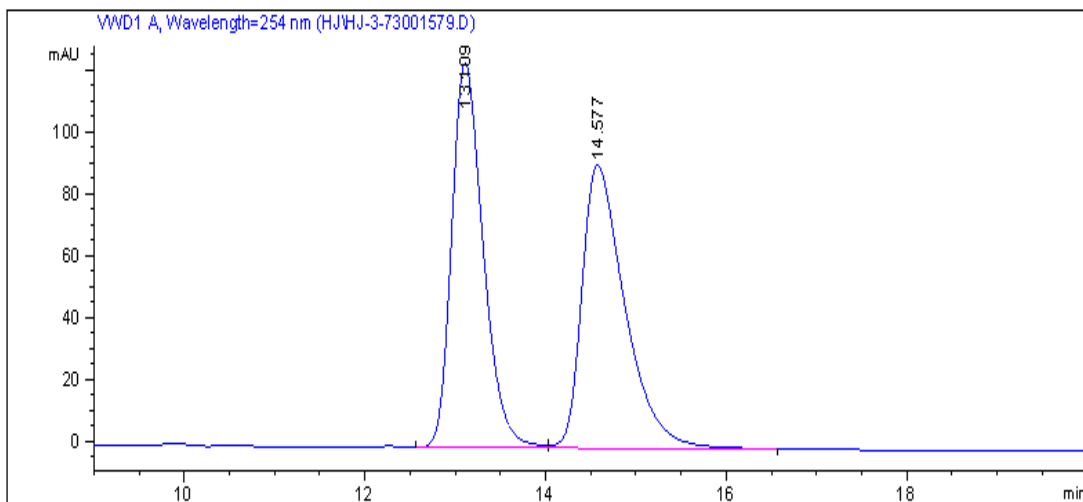

| Peak # | RetTime [min] | Type | Width [min] | Area [mAU*s] | Height [mAU] | Area %  |
|--------|---------------|------|-------------|--------------|--------------|---------|
| 1      | 13.109        | BV   | 0.3728      | 3011.39160   | 124.21409    | 49.8766 |
| 2      | 14.577        | VBA  | 0.4975      | 3026.29736   | 91.58424     | 50.1234 |

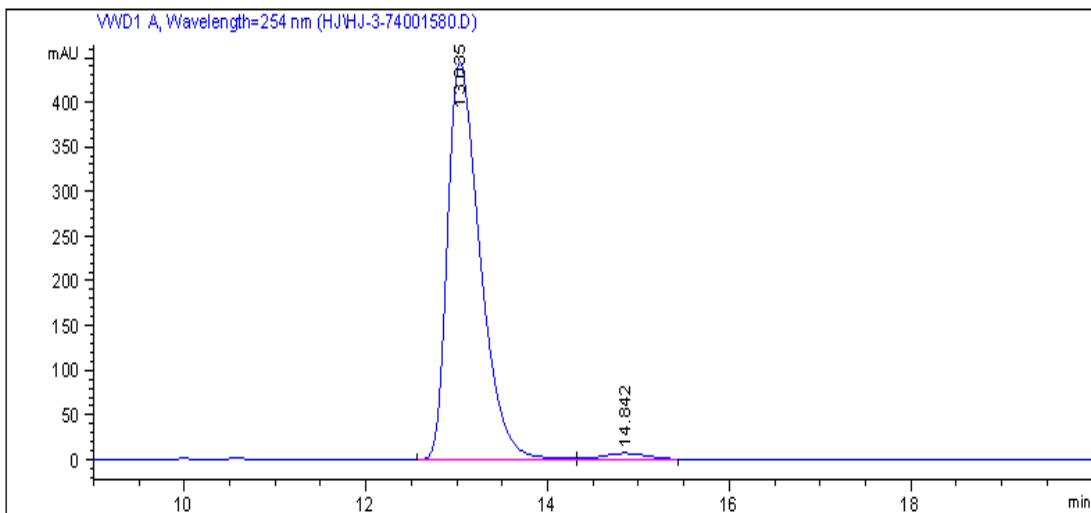

| Peak # | RetTime [min] | Type | Width [min] | Area [mAU*s] | Height [mAU] | Area %  |
|--------|---------------|------|-------------|--------------|--------------|---------|
| 1      | 13.035        | BV   | 0.3804      | 1.10501e4    | 443.88492    | 97.9243 |
| 2      | 14.842        | VBA  | 0.5226      | 234.23312    | 6.99649      | 2.0757  |

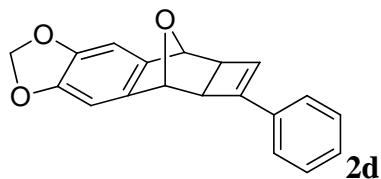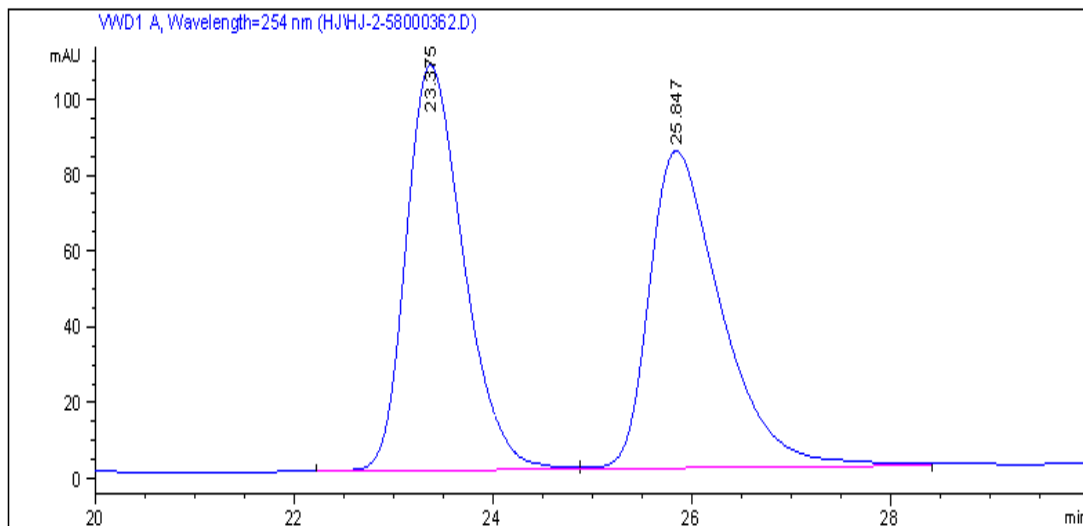

| Peak # | RetTime [min] | Type | Width [min] | Area [mAU*s] | Height [mAU] | Area %  |
|--------|---------------|------|-------------|--------------|--------------|---------|
| 1      | 23.375        | VV   | 0.6203      | 4279.66455   | 106.60838    | 50.4310 |
| 2      | 25.847        | VV   | 0.7525      | 4206.51855   | 83.39254     | 49.5690 |

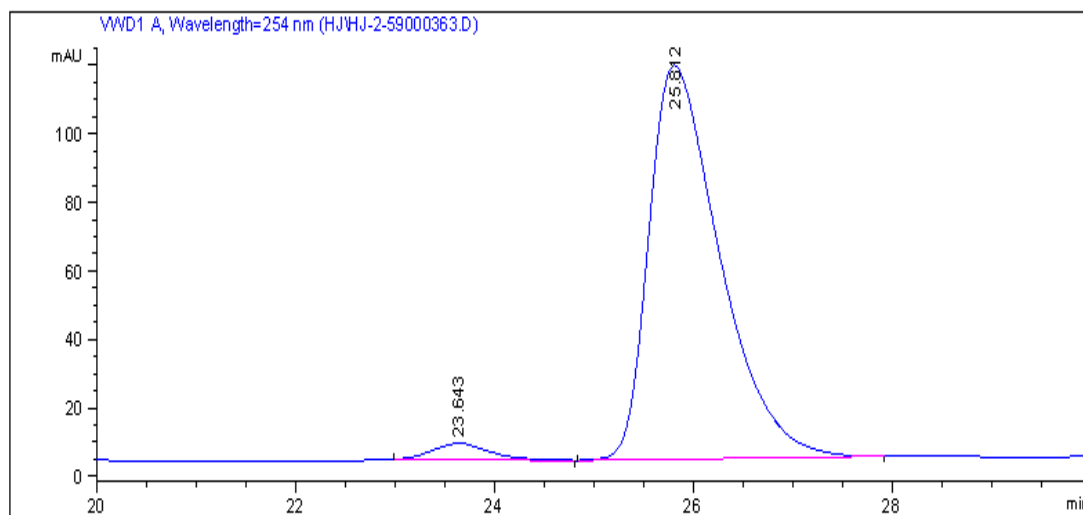

| Peak # | RetTime [min] | Type | Width [min] | Area [mAU*s] | Height [mAU] | Area %  |
|--------|---------------|------|-------------|--------------|--------------|---------|
| 1      | 23.643        | BB   | 0.6294      | 193.16092    | 4.73995      | 3.2863  |
| 2      | 25.812        | BB   | 0.7516      | 5684.66406   | 114.82446    | 96.7137 |



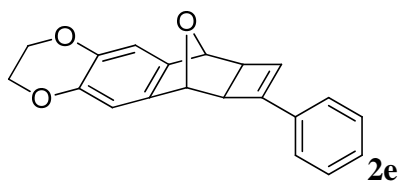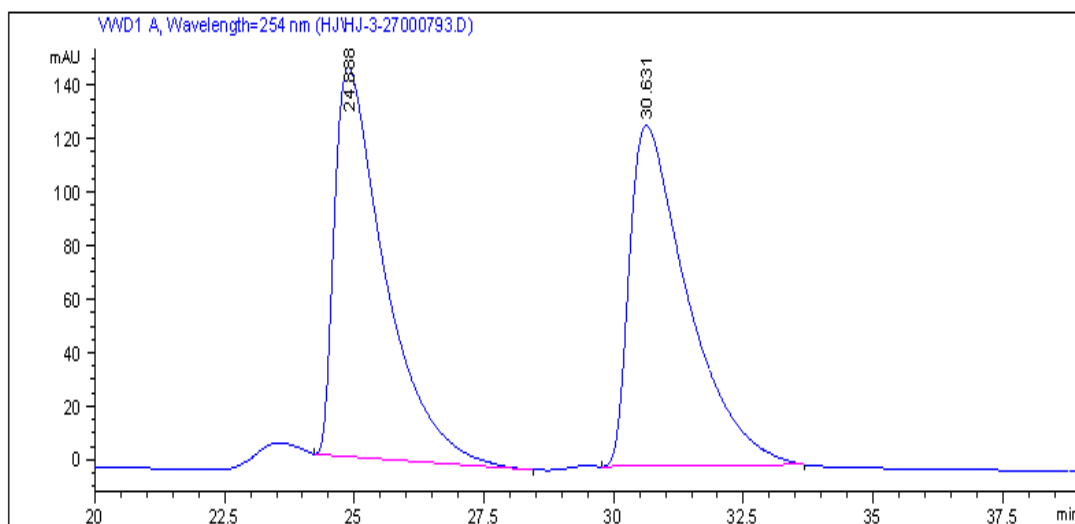

| Peak # | RetTime [min] | Type | Width [min] | Area [mAU*s] | Height [mAU] | Area %  |
|--------|---------------|------|-------------|--------------|--------------|---------|
| 1      | 24.888        | BB   | 0.9934      | 9809.07520   | 145.69969    | 49.6799 |
| 2      | 30.631        | BBA  | 1.1160      | 9935.46680   | 127.38017    | 50.3201 |

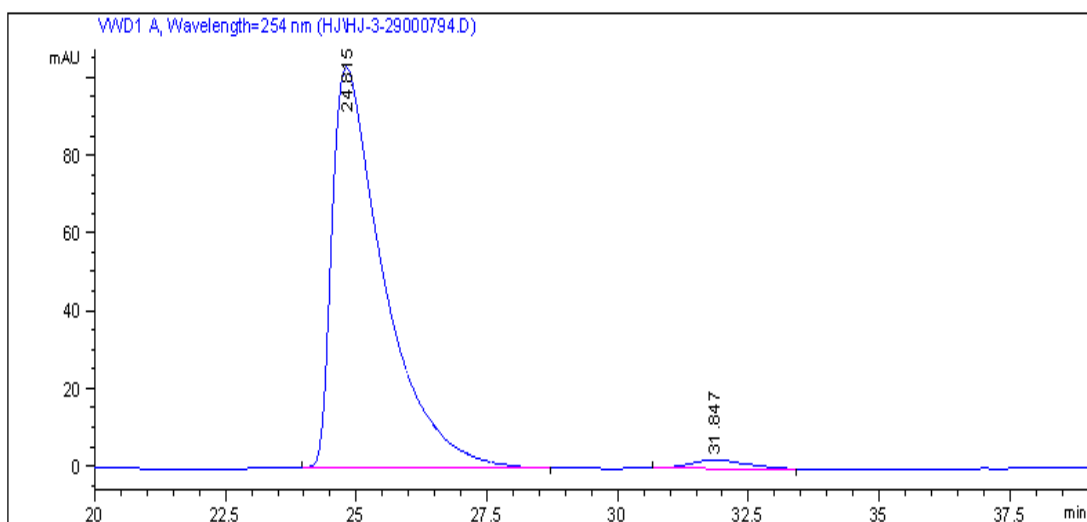

| Peak # | RetTime [min] | Type | Width [min] | Area [mAU*s] | Height [mAU] | Area %  |
|--------|---------------|------|-------------|--------------|--------------|---------|
| 1      | 24.815        | BB   | 0.9947      | 7059.96924   | 102.87367    | 97.7328 |
| 2      | 31.847        | BBA  | 1.1531      | 163.77815    | 2.12518      | 2.2672  |

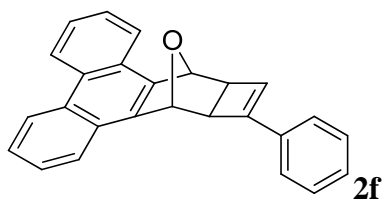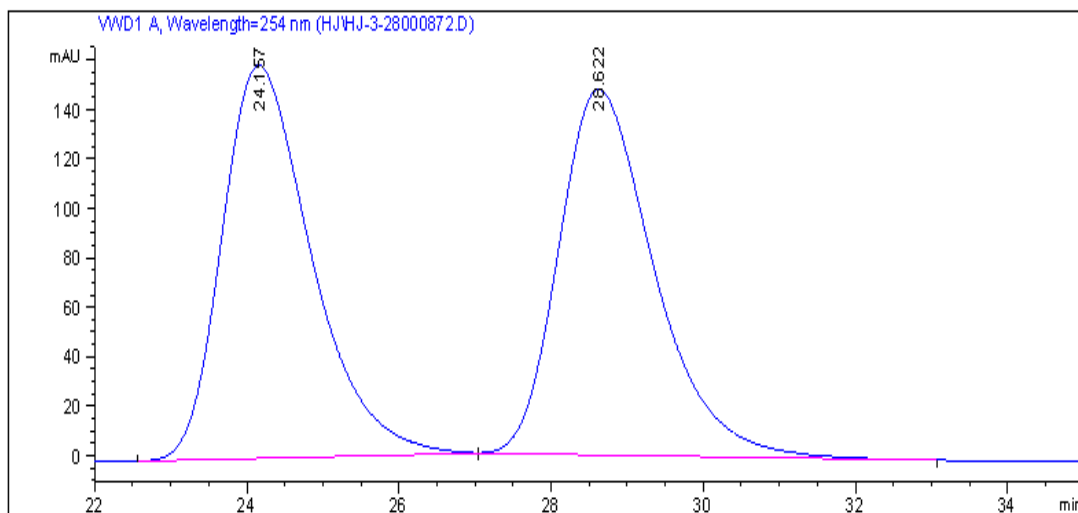

| Peak # | RetTime [min] | Type | Width [min] | Area [mAU*s] | Height [mAU] | Area %  |
|--------|---------------|------|-------------|--------------|--------------|---------|
| 1      | 24.157        | BB   | 1.2566      | 1.29661e4    | 158.80185    | 50.1572 |
| 2      | 28.622        | BB   | 1.3332      | 1.28848e4    | 147.77661    | 49.8428 |

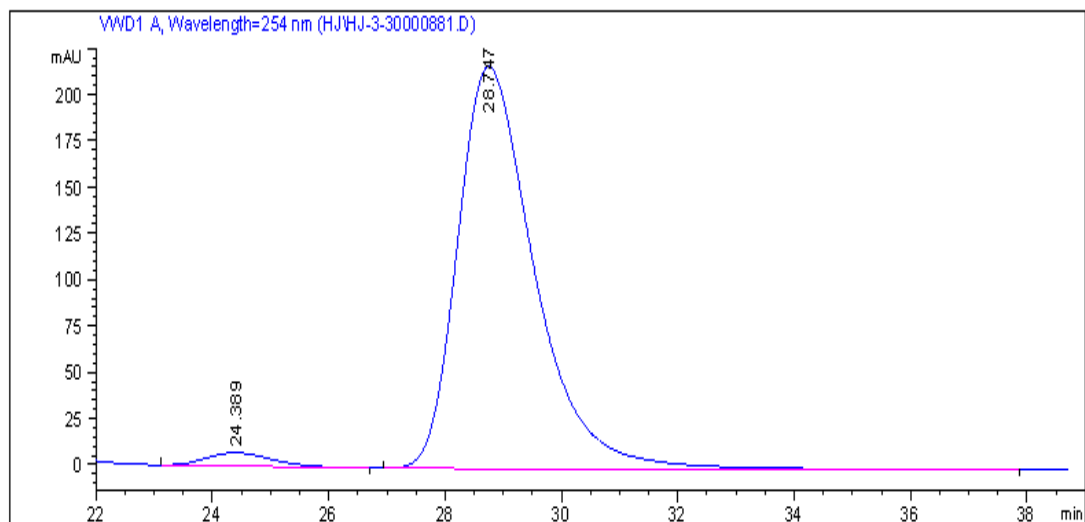

| Peak # | RetTime [min] | Type | Width [min] | Area [mAU*s] | Height [mAU] | Area %  |
|--------|---------------|------|-------------|--------------|--------------|---------|
| 1      | 24.389        | BB   | 1.1373      | 567.73303    | 7.27651      | 2.7705  |
| 2      | 28.747        | BB   | 1.3863      | 1.99243e4    | 217.39552    | 97.2295 |

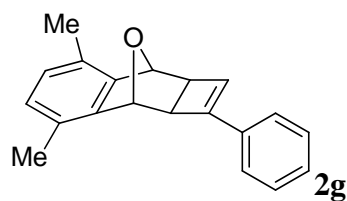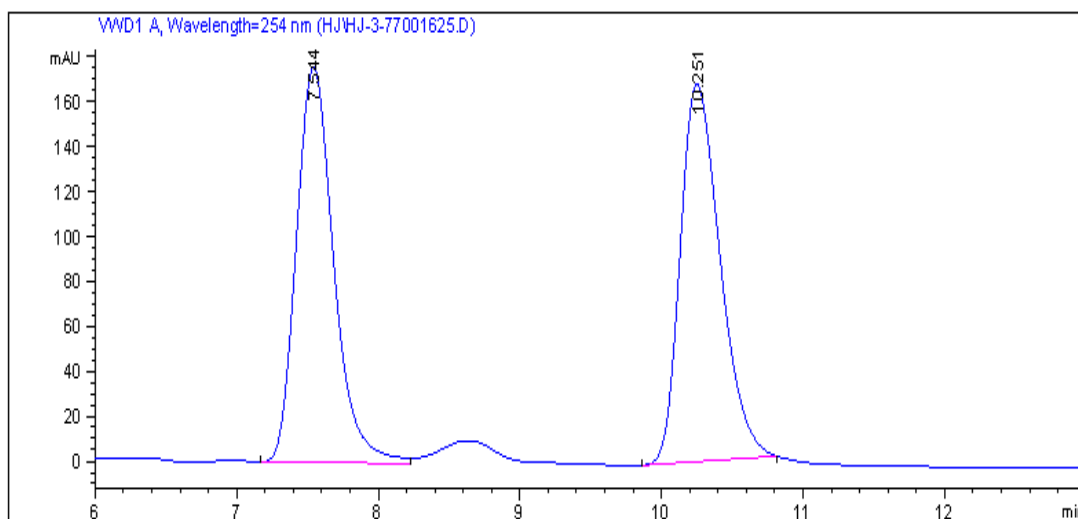

| Peak # | RetTime [min] | Type | Width [min] | Area [mAU*s] | Height [mAU] | Area %  |
|--------|---------------|------|-------------|--------------|--------------|---------|
| 1      | 7.544         | BV   | 0.2841      | 3221.32886   | 175.56178    | 49.6149 |
| 2      | 10.251        | BBA  | 0.2994      | 3271.32935   | 167.85048    | 50.3851 |

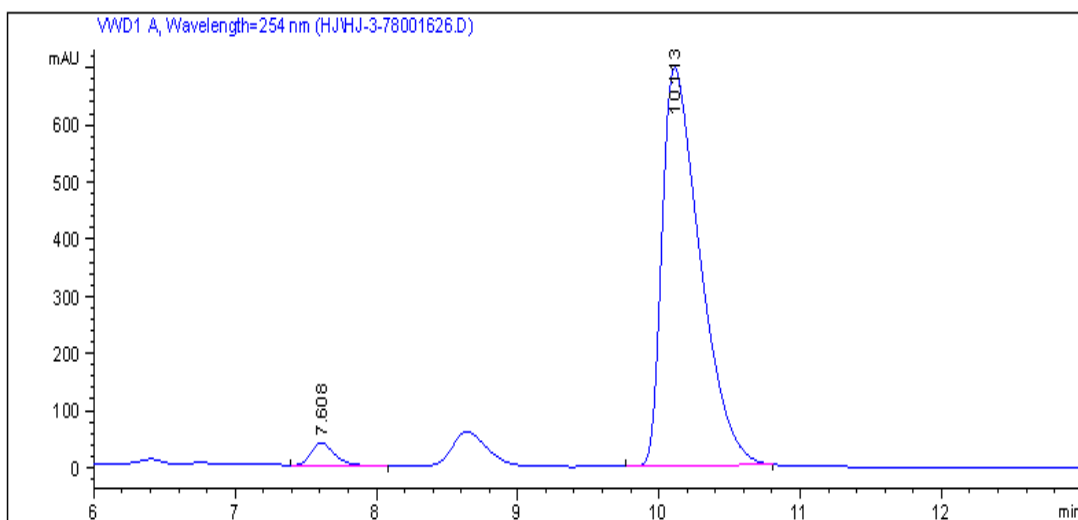

| Peak # | RetTime [min] | Type | Width [min] | Area [mAU*s] | Height [mAU] | Area %  |
|--------|---------------|------|-------------|--------------|--------------|---------|
| 1      | 7.608         | BB   | 0.1746      | 469.80133    | 40.73385     | 3.4809  |
| 2      | 10.113        | VBA  | 0.2840      | 1.30269e4    | 697.05457    | 96.5191 |

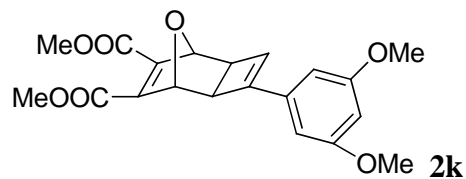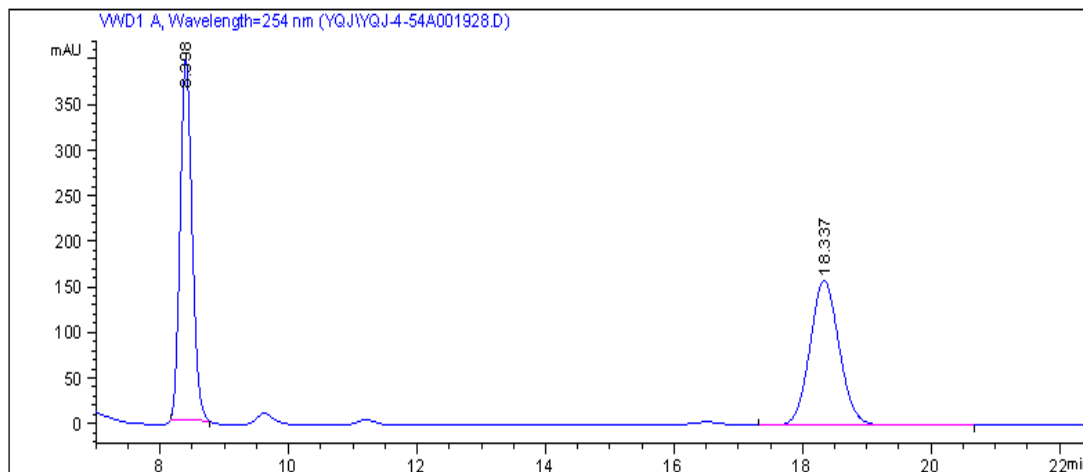

| Peak # | RetTime [min] | Type | Width [min] | Area [mAU*s] | Height [mAU] | Area %  |
|--------|---------------|------|-------------|--------------|--------------|---------|
| 1      | 8.398         | BBA  | 0.2007      | 5114.18457   | 395.91208    | 50.3573 |
| 2      | 18.337        | BBA  | 0.4895      | 5041.61133   | 159.19398    | 49.6427 |

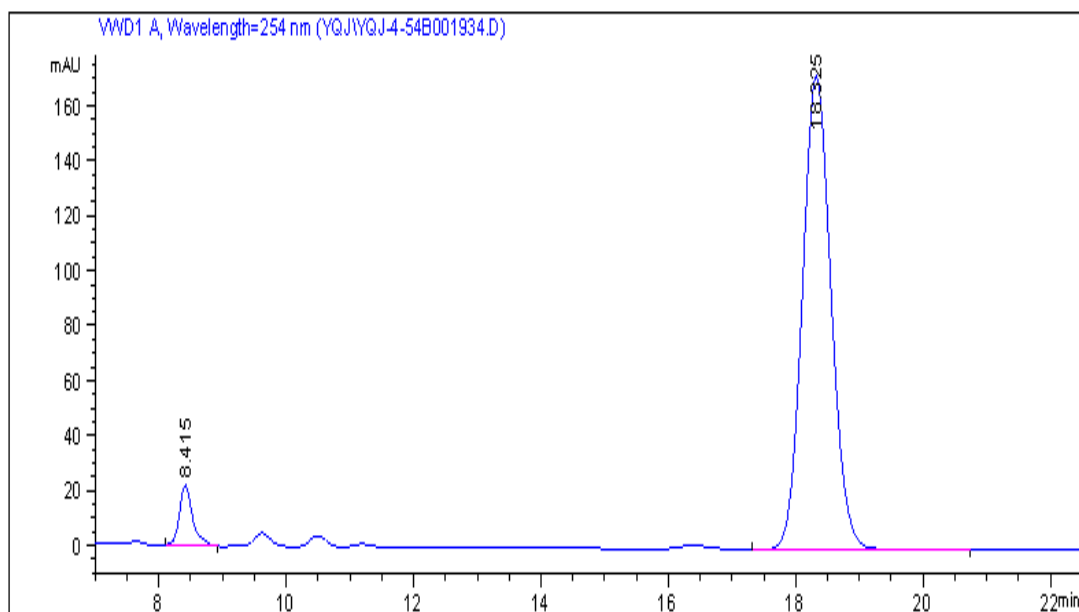

| Peak # | RetTime [min] | Type | Width [min] | Area [mAU*s] | Height [mAU] | Area %  |
|--------|---------------|------|-------------|--------------|--------------|---------|
| 1      | 8.415         | BBA  | 0.2139      | 309.25519    | 21.74284     | 5.4338  |
| 2      | 18.325        | BBA  | 0.4846      | 5382.03418   | 172.20247    | 94.5662 |

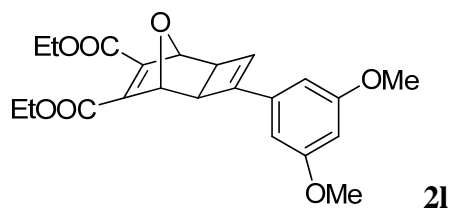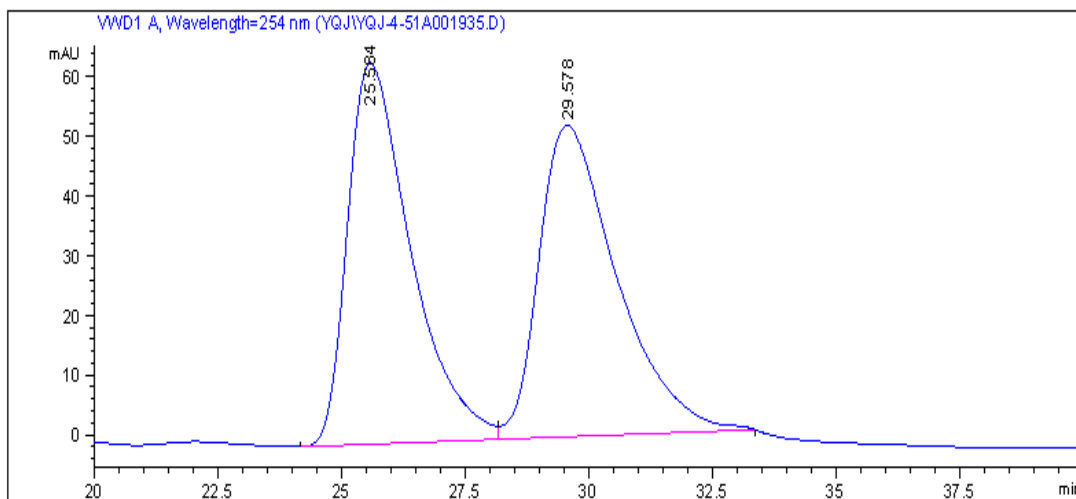

| Peak # | RetTime [min] | Type | Width [min] | Area [mAU*s] | Height [mAU] | Area %  |
|--------|---------------|------|-------------|--------------|--------------|---------|
| 1      | 25.584        | BV   | 1.3131      | 5693.17432   | 63.92074     | 49.8476 |
| 2      | 29.578        | VBA  | 1.6483      | 5727.97900   | 52.19634     | 50.1524 |

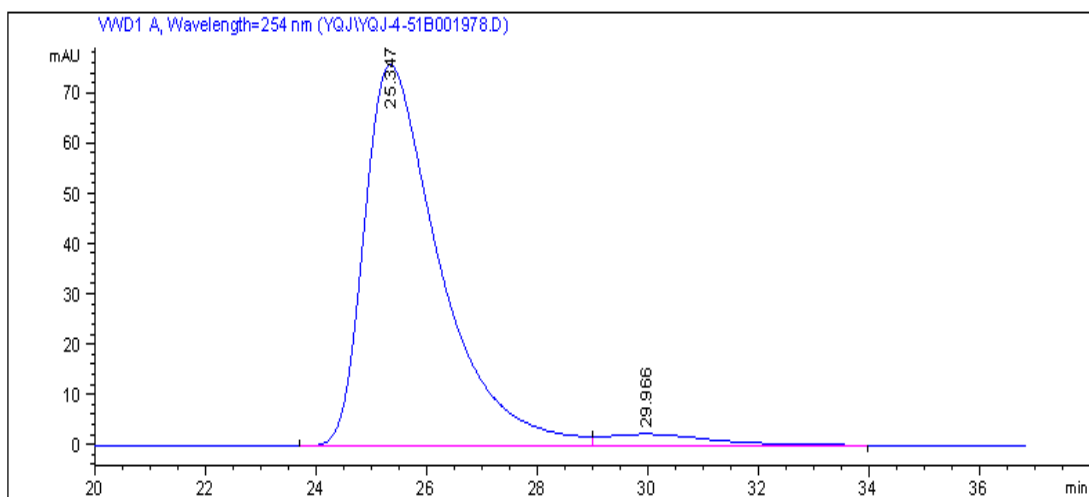

| Peak # | RetTime [min] | Type | Width [min] | Area [mAU*s] | Height [mAU] | Area %  |
|--------|---------------|------|-------------|--------------|--------------|---------|
| 1      | 25.347        | BV   | 1.4029      | 7179.57227   | 75.80927     | 96.0064 |
| 2      | 29.966        | VB   | 1.6344      | 298.64951    | 2.25318      | 3.9936  |

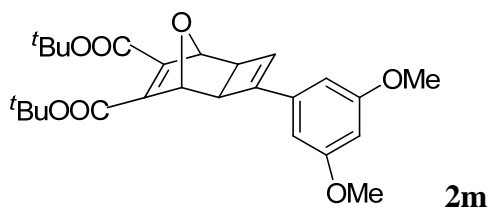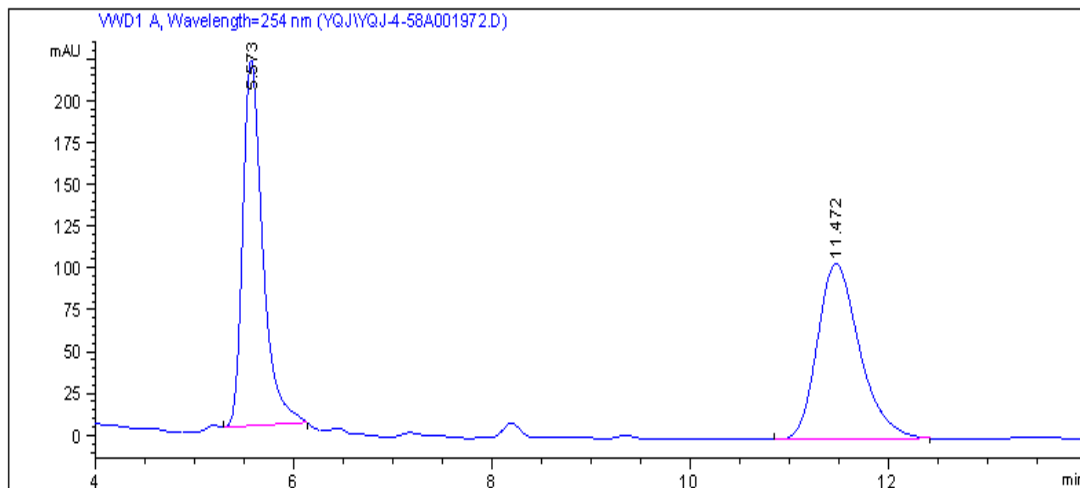

| Peak # | RetTime [min] | Type | Width [min] | Area [mAU*s] | Height [mAU] | Area %  |
|--------|---------------|------|-------------|--------------|--------------|---------|
| 1      | 5.573         | BBA  | 0.2111      | 3054.01367   | 218.41600    | 49.6179 |
| 2      | 11.472        | BBA  | 0.4527      | 3101.05298   | 104.94494    | 50.3821 |

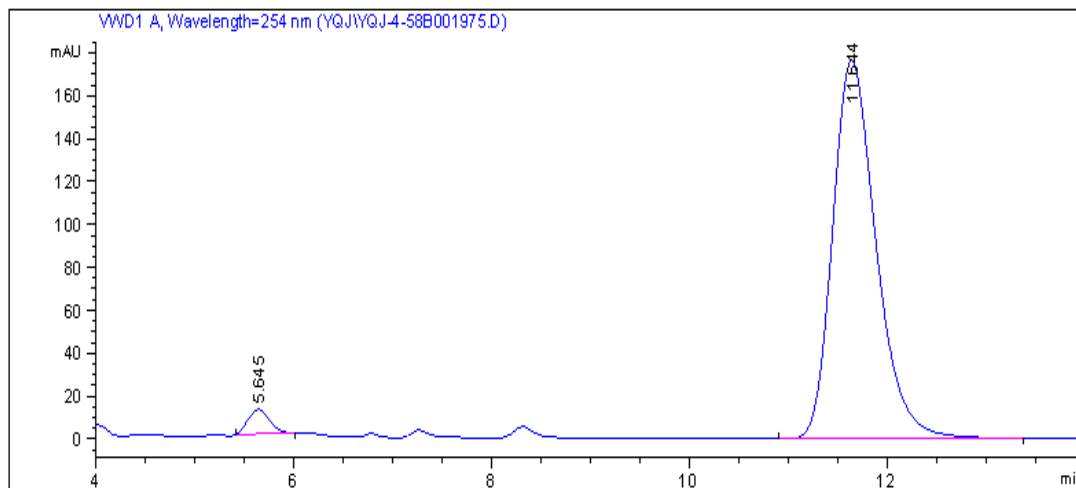

| Peak # | RetTime [min] | Type | Width [min] | Area [mAU*s] | Height [mAU] | Area %  |
|--------|---------------|------|-------------|--------------|--------------|---------|
| 1      | 5.645         | BBA  | 0.2393      | 169.69887    | 11.29485     | 3.0550  |
| 2      | 11.644        | BBA  | 0.4684      | 5385.14355   | 176.29131    | 96.9450 |

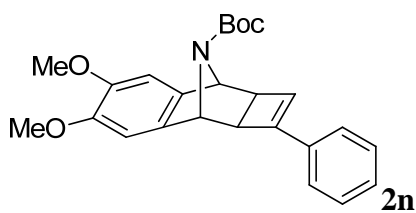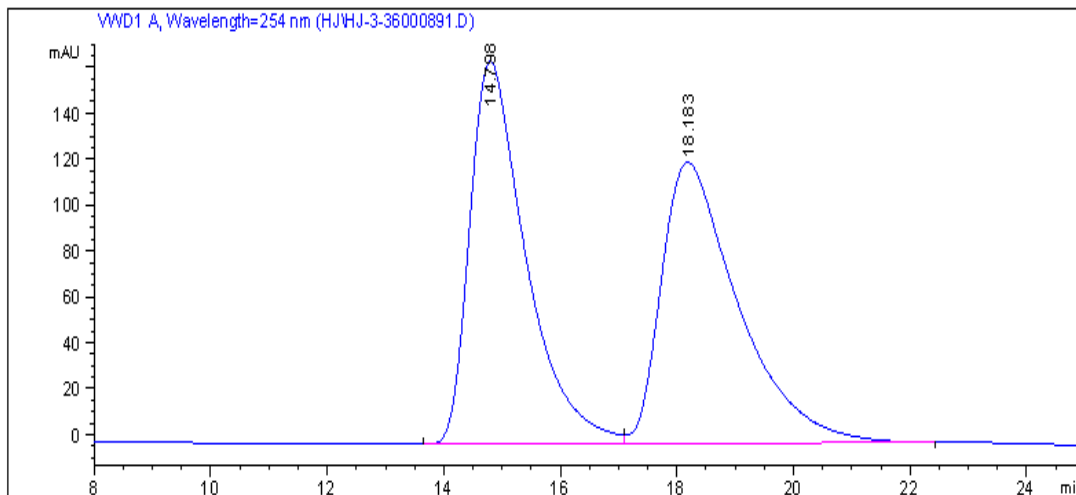

| Peak # | RetTime [min] | Type | Width [min] | Area [mAU*s] | Height [mAU] | Area %  |
|--------|---------------|------|-------------|--------------|--------------|---------|
| 1      | 14.798        | BV   | 0.9921      | 1.11408e4    | 166.62422    | 49.8394 |
| 2      | 18.183        | VB   | 1.3396      | 1.12126e4    | 122.41810    | 50.1606 |

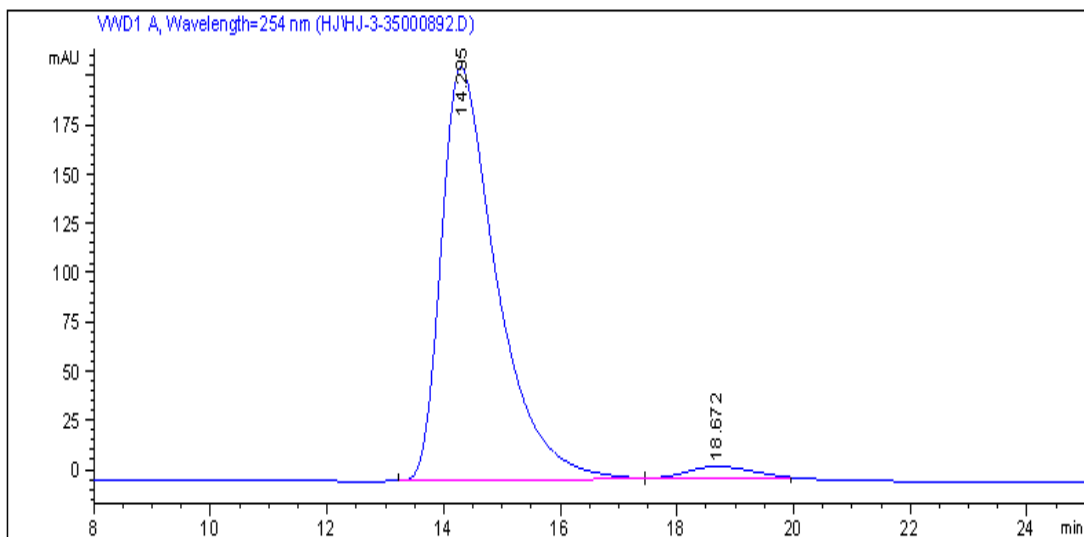

| Peak # | RetTime [min] | Type | Width [min] | Area [mAU*s] | Height [mAU] | Area %  |
|--------|---------------|------|-------------|--------------|--------------|---------|
| 1      | 14.295        | BV   | 0.9846      | 1.38952e4    | 209.82823    | 96.9482 |
| 2      | 18.672        | VBA  | 1.1794      | 437.41043    | 5.75072      | 3.0518  |

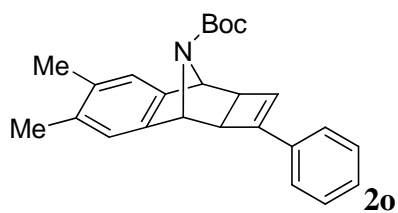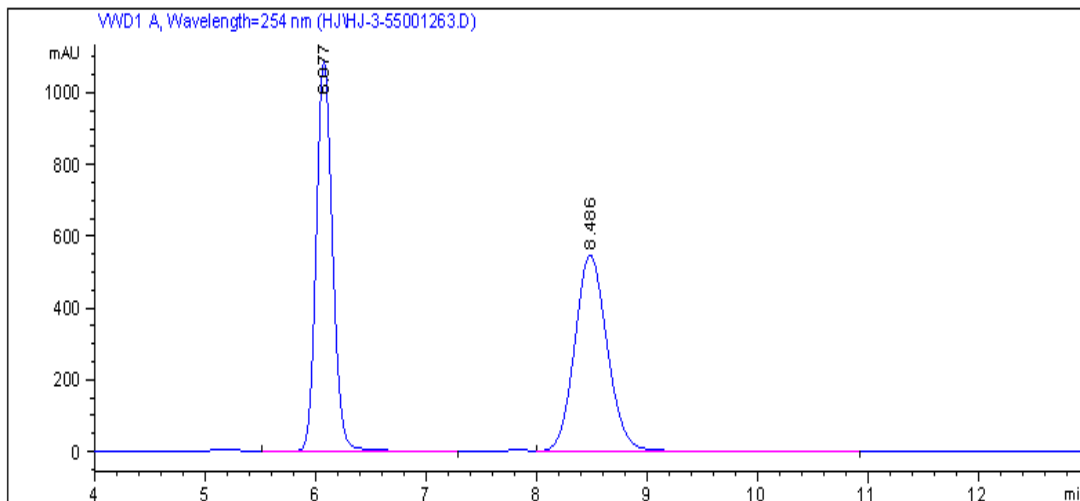

| Peak # | RetTime [min] | Type | Width [min] | Area [mAU*s] | Height [mAU] | Area %  |
|--------|---------------|------|-------------|--------------|--------------|---------|
| 1      | 6.077         | BB   | 0.1603      | 1.11805e4    | 1083.92676   | 49.8107 |
| 2      | 8.486         | VB   | 0.3201      | 1.12655e4    | 547.37988    | 50.1893 |

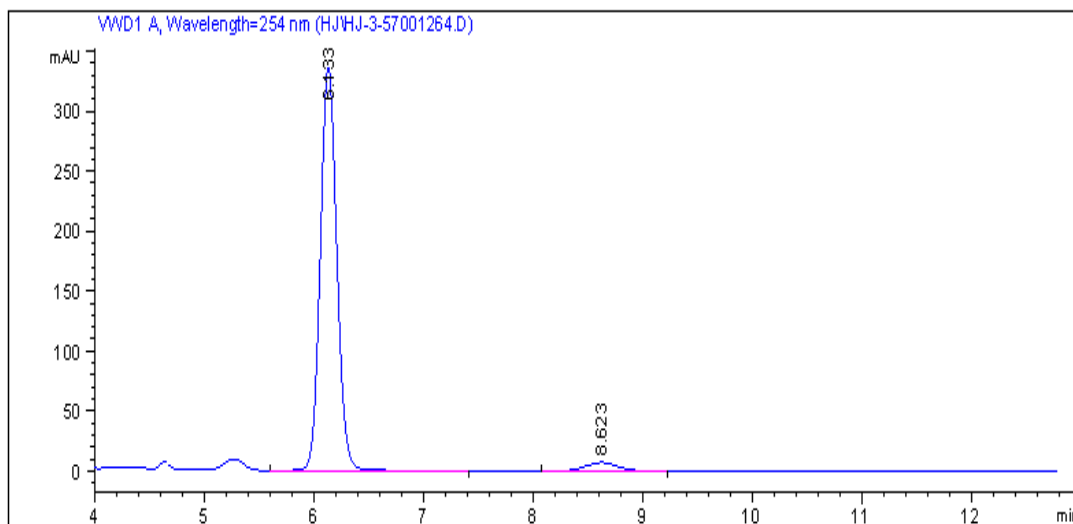

| Peak # | RetTime [min] | Type | Width [min] | Area [mAU*s] | Height [mAU] | Area %  |
|--------|---------------|------|-------------|--------------|--------------|---------|
| 1      | 6.133         | BB   | 0.1624      | 3525.69531   | 336.14624    | 95.9448 |
| 2      | 8.623         | BV   | 0.3267      | 149.01587    | 7.04811      | 4.0552  |



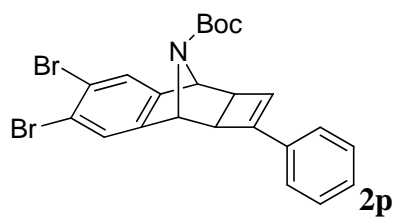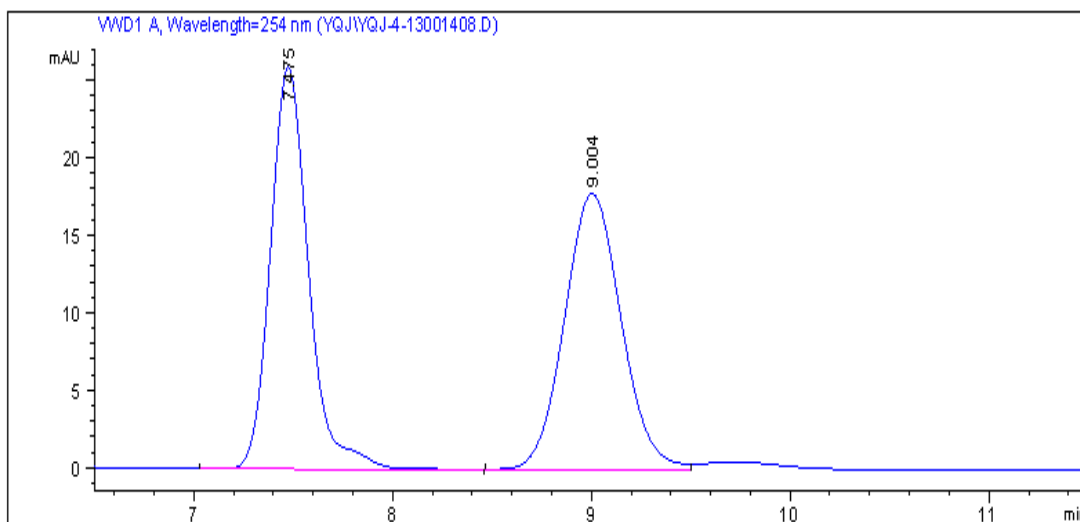

| Peak # | RetTime [min] | Type | Width [min] | Area [mAU*s] | Height [mAU] | Area %  |
|--------|---------------|------|-------------|--------------|--------------|---------|
| 1      | 7.475         | BB   | 0.2053      | 345.17194    | 25.93069     | 49.4627 |
| 2      | 9.004         | BV   | 0.3071      | 352.67126    | 17.80076     | 50.5373 |

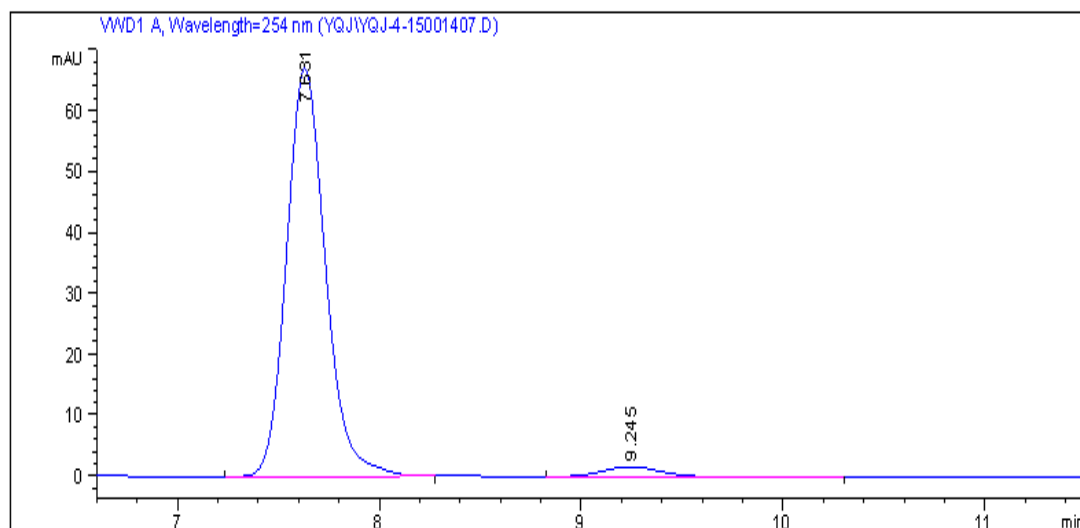

| Peak # | RetTime [min] | Type | Width [min] | Area [mAU*s] | Height [mAU] | Area %  |
|--------|---------------|------|-------------|--------------|--------------|---------|
| 1      | 7.631         | BB   | 0.2083      | 897.84973    | 67.03928     | 96.4098 |
| 2      | 9.245         | BB   | 0.3146      | 33.43456     | 1.66271      | 3.5902  |

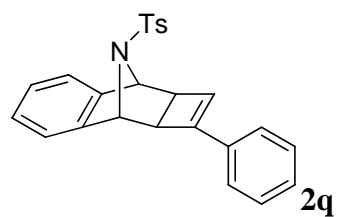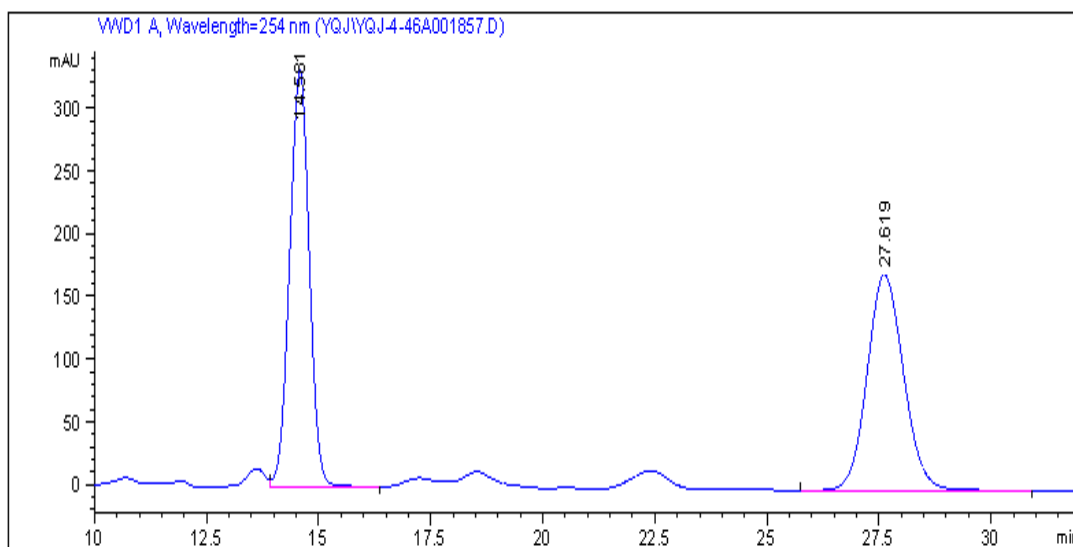

| Peak # | RetTime [min] | Type | Width [min] | Area [mAU*s] | Height [mAU] | Area %  |
|--------|---------------|------|-------------|--------------|--------------|---------|
| 1      | 14.581        | VB   | 0.4856      | 1.01428e4    | 330.89502    | 50.9329 |
| 2      | 27.619        | BB   | 0.8863      | 9771.27246   | 172.13429    | 49.0671 |

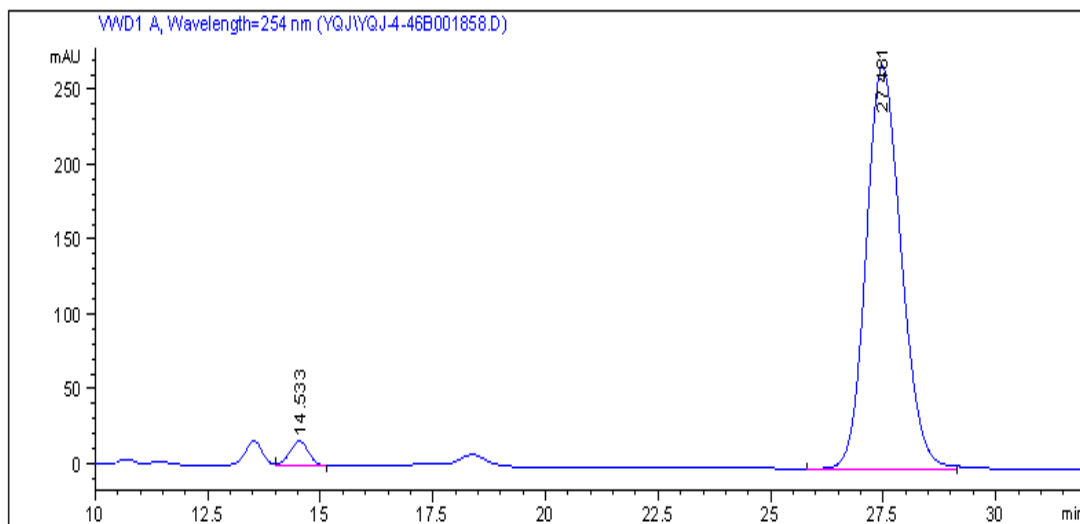

| Peak # | RetTime [min] | Type | Width [min] | Area [mAU*s] | Height [mAU] | Area %  |
|--------|---------------|------|-------------|--------------|--------------|---------|
| 1      | 14.533        | VB   | 0.4443      | 465.66647    | 16.34956     | 3.0954  |
| 2      | 27.481        | BV   | 0.8381      | 1.45780e4    | 269.04993    | 96.9046 |

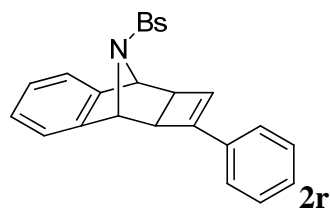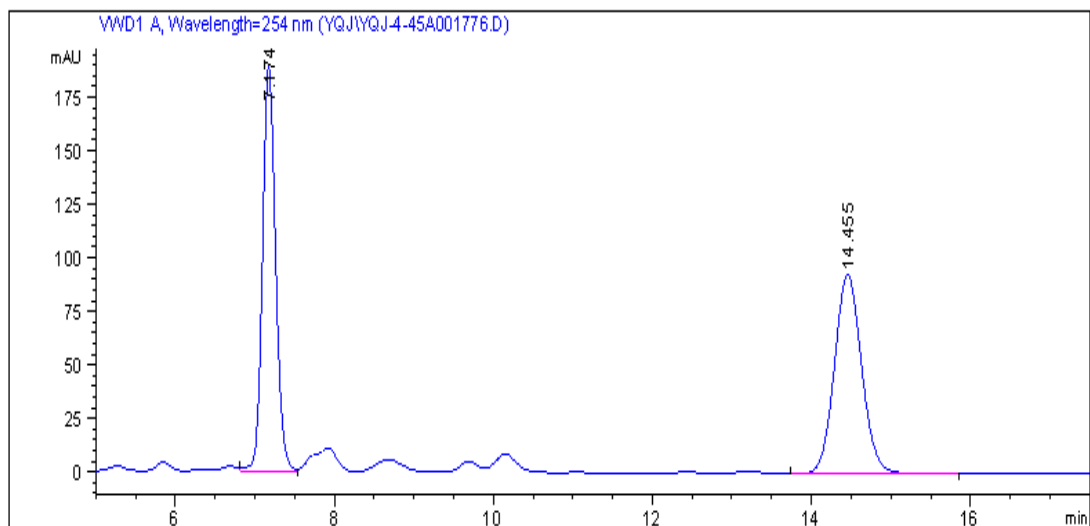

| Peak # | RetTime [min] | Type | Width [min] | Area [mAU*s] | Height [mAU] | Area %  |
|--------|---------------|------|-------------|--------------|--------------|---------|
| 1      | 7.174         | VV   | 0.1756      | 2160.80176   | 188.75780    | 49.5290 |
| 2      | 14.455        | BB   | 0.3682      | 2201.89917   | 92.99409     | 50.4710 |

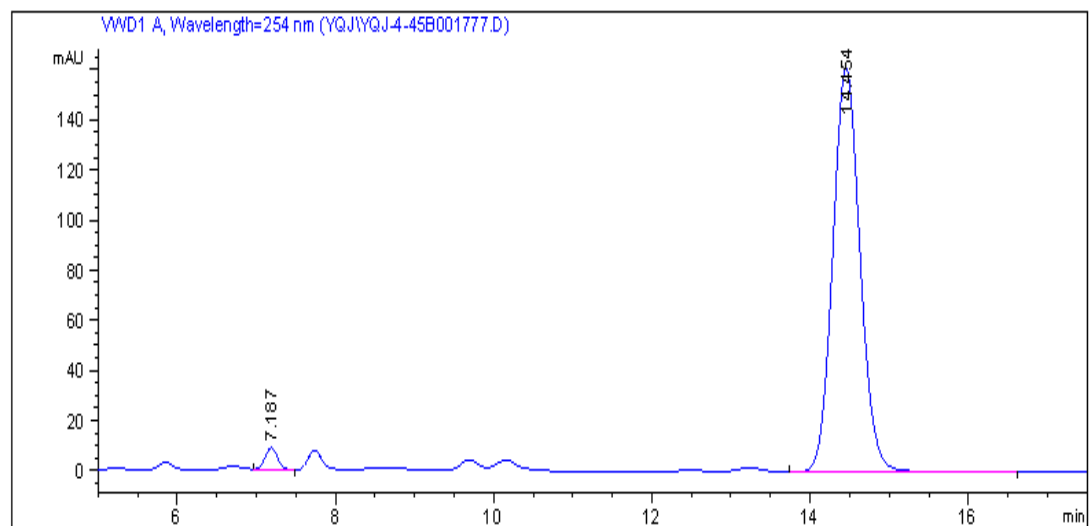

| Peak # | RetTime [min] | Type | Width [min] | Area [mAU*s] | Height [mAU] | Area %  |
|--------|---------------|------|-------------|--------------|--------------|---------|
| 1      | 7.187         | VB   | 0.1773      | 102.18183    | 8.94381      | 2.5878  |
| 2      | 14.454        | BB   | 0.3701      | 3846.36255   | 161.35265    | 97.4122 |

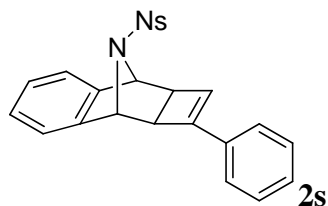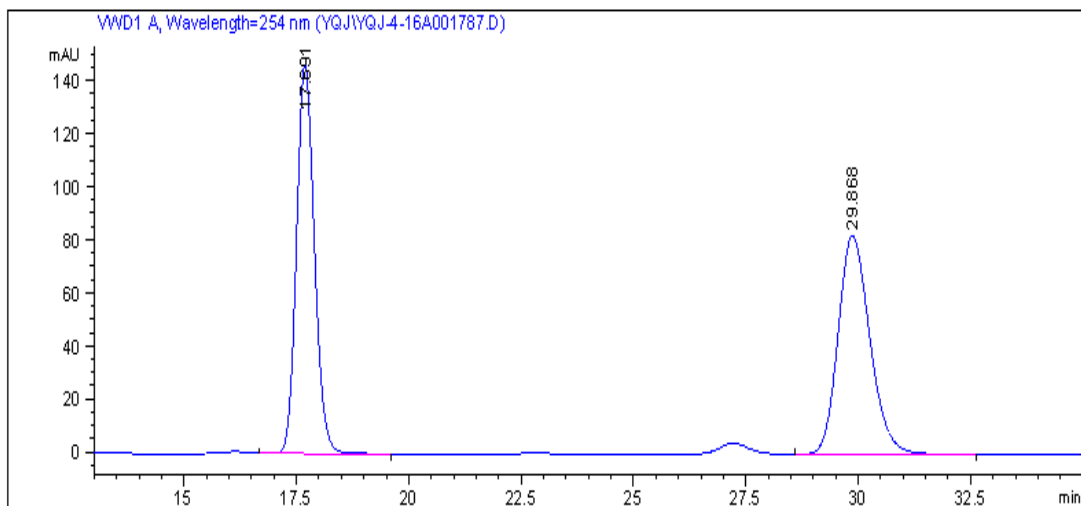

| Peak # | RetTime [min] | Type | Width [min] | Area [mAU*s] | Height [mAU] | Area %  |
|--------|---------------|------|-------------|--------------|--------------|---------|
| 1      | 17.691        | BB   | 0.4281      | 4057.56812   | 146.95393    | 50.0216 |
| 2      | 29.868        | VB   | 0.7629      | 4054.06177   | 82.56422     | 49.9784 |

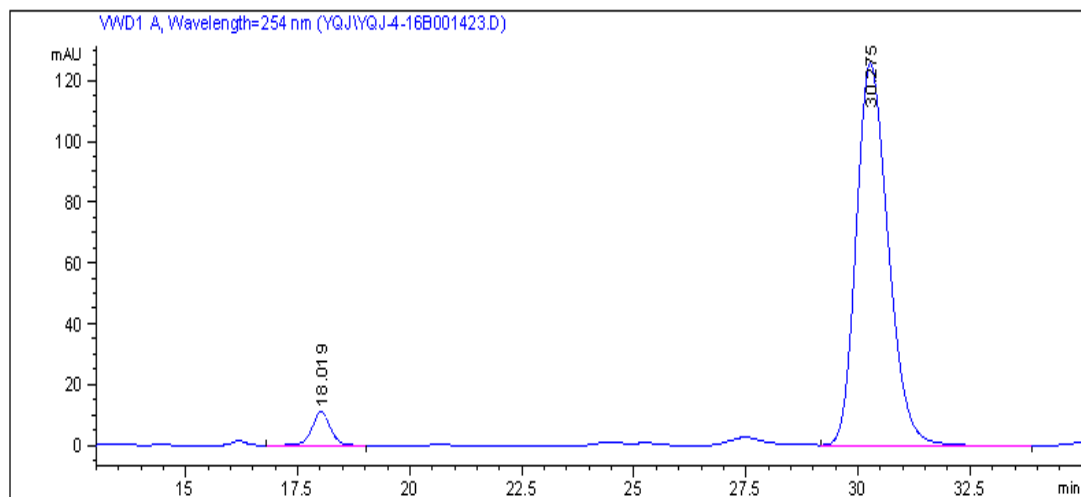

| Peak # | RetTime [min] | Type | Width [min] | Area [mAU*s] | Height [mAU] | Area %  |
|--------|---------------|------|-------------|--------------|--------------|---------|
| 1      | 18.019        | BB   | 0.4402      | 317.44958    | 11.01645     | 4.8122  |
| 2      | 30.275        | VB   | 0.7717      | 6279.37451   | 125.94003    | 95.1878 |

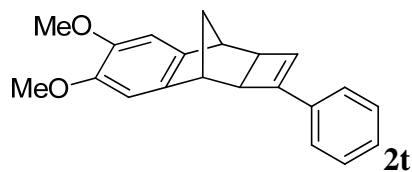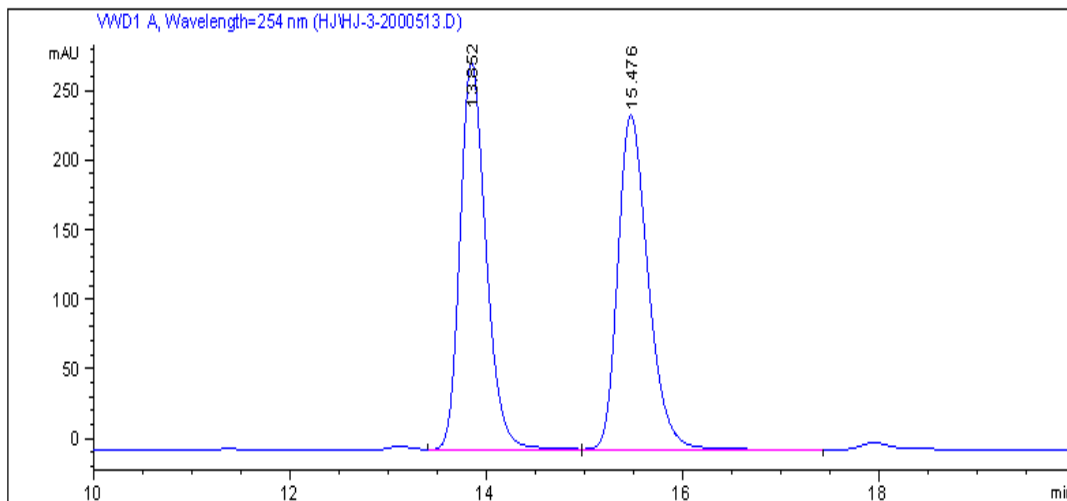

| Peak # | RetTime [min] | Type | Width [min] | Area [mAU*s] | Height [mAU] | Area %  |
|--------|---------------|------|-------------|--------------|--------------|---------|
| 1      | 13.852        | VB   | 0.2824      | 5110.34717   | 278.06882    | 49.8476 |
| 2      | 15.476        | BB   | 0.3296      | 5141.58740   | 240.28020    | 50.1524 |

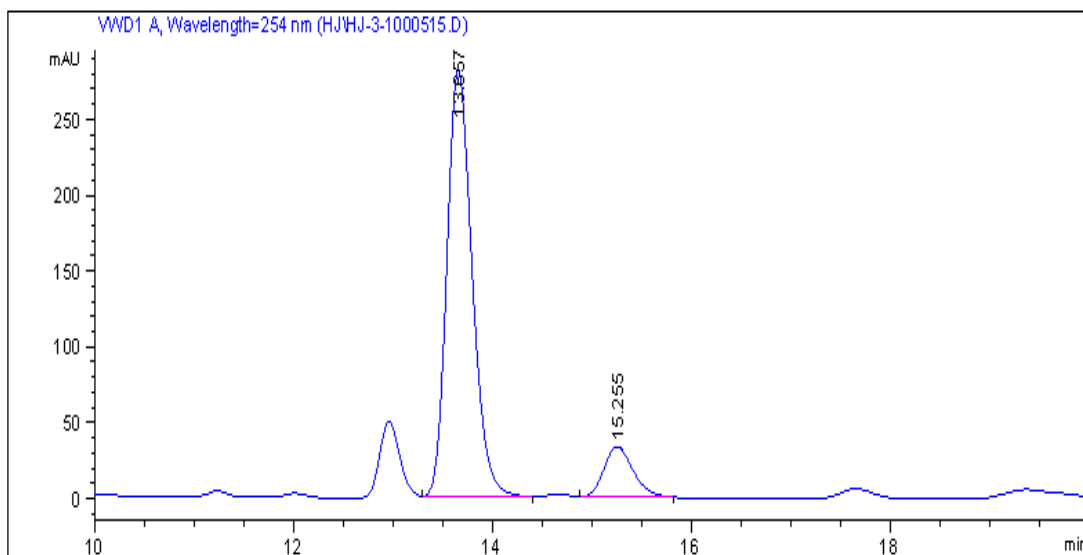

| Peak # | RetTime [min] | Type | Width [min] | Area [mAU*s] | Height [mAU] | Area %  |
|--------|---------------|------|-------------|--------------|--------------|---------|
| 1      | 13.657        | BBA  | 0.2728      | 4935.91406   | 281.21570    | 87.9480 |
| 2      | 15.255        | BBA  | 0.3137      | 676.39691    | 33.19622     | 12.0520 |

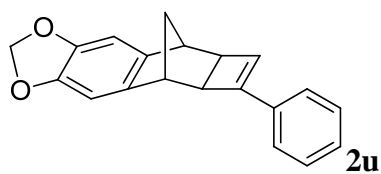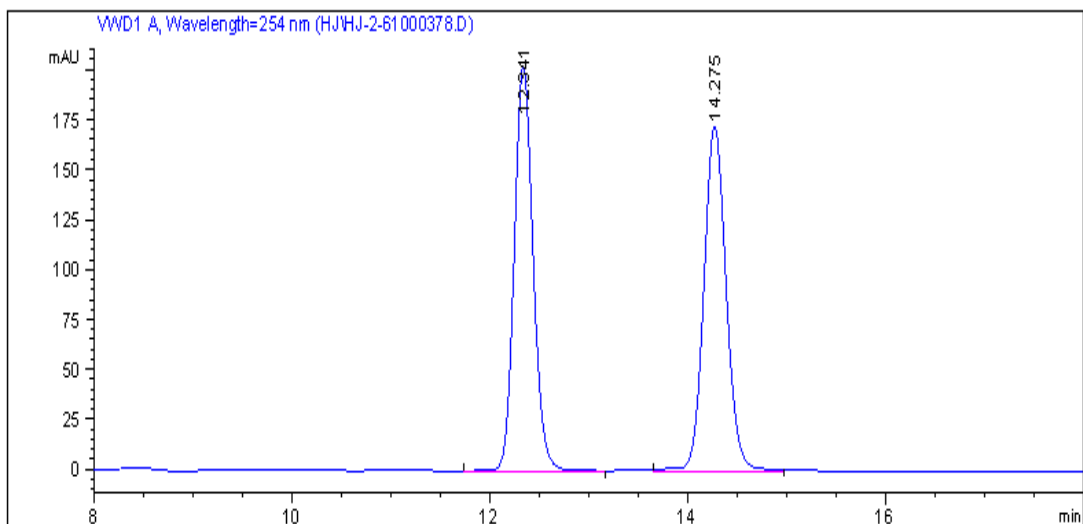

| Peak # | RetTime [min] | Type | Width [min] | Area [mAU* s] | Height [mAU] | Area %  |
|--------|---------------|------|-------------|---------------|--------------|---------|
| 1      | 12.341        | BB   | 0.2065      | 2676.59717    | 202.16405    | 49.6473 |
| 2      | 14.275        | VV   | 0.2436      | 2714.62842    | 172.50690    | 50.3527 |

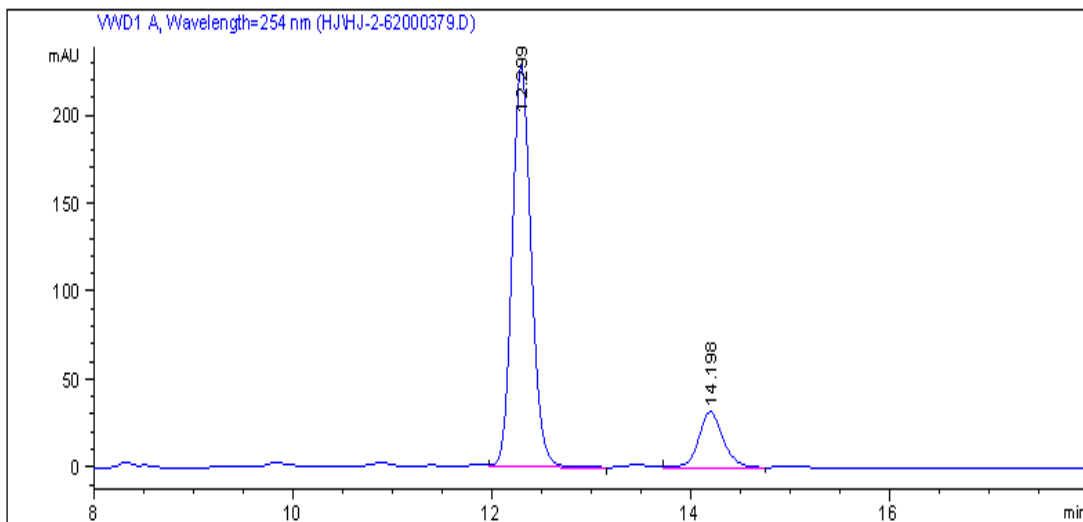

| Peak # | RetTime [min] | Type | Width [min] | Area [mAU* s] | Height [mAU] | Area %  |
|--------|---------------|------|-------------|---------------|--------------|---------|
| 1      | 12.299        | VB   | 0.2068      | 3029.28491    | 228.35631    | 84.6225 |
| 2      | 14.198        | VV   | 0.2662      | 550.47595     | 31.75687     | 15.3775 |

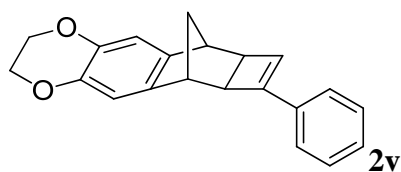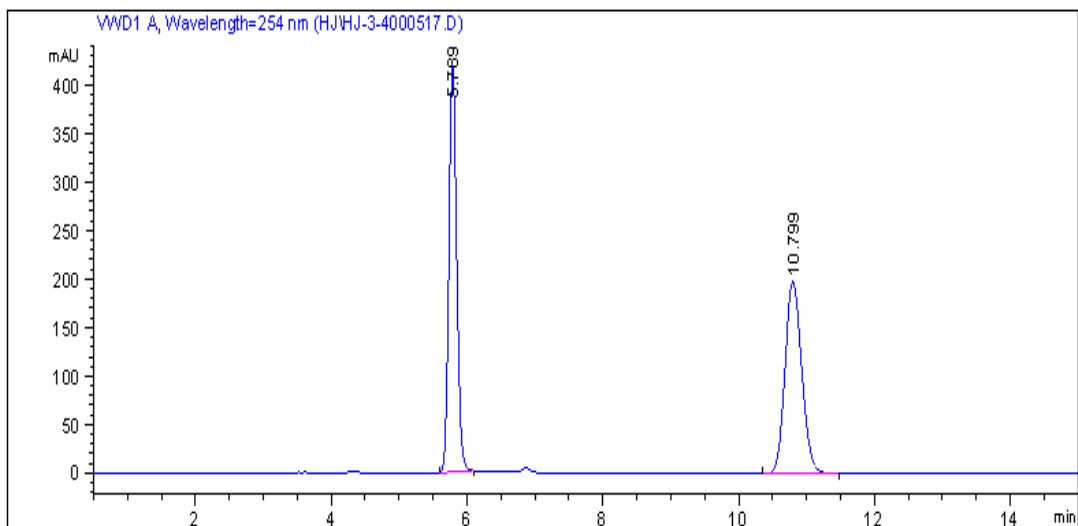

| Peak # | RetTime [min] | Type | Width [min] | Area [mAU*s] | Height [mAU] | Area %  |
|--------|---------------|------|-------------|--------------|--------------|---------|
| 1      | 5.789         | BBA  | 0.1258      | 3358.72192   | 417.78687    | 49.7381 |
| 2      | 10.799        | BBA  | 0.2676      | 3394.09766   | 198.39313    | 50.2619 |

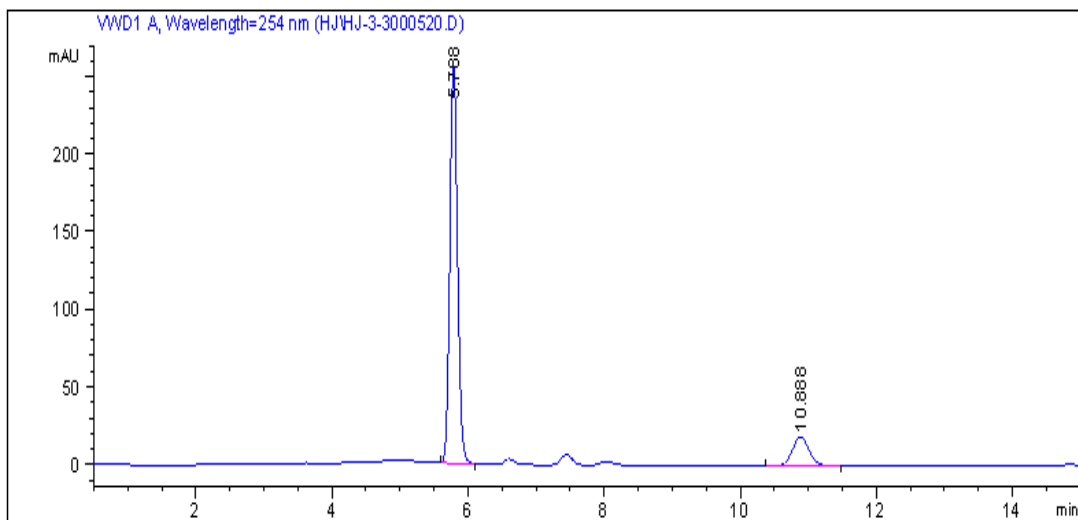

| Peak # | RetTime [min] | Type | Width [min] | Area [mAU*s] | Height [mAU] | Area %  |
|--------|---------------|------|-------------|--------------|--------------|---------|
| 1      | 5.788         | BBA  | 0.1239      | 2012.01245   | 255.41867    | 86.5950 |
| 2      | 10.888        | BBA  | 0.2652      | 311.46225    | 18.42547     | 13.4050 |

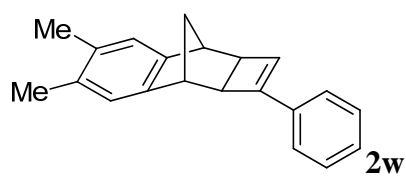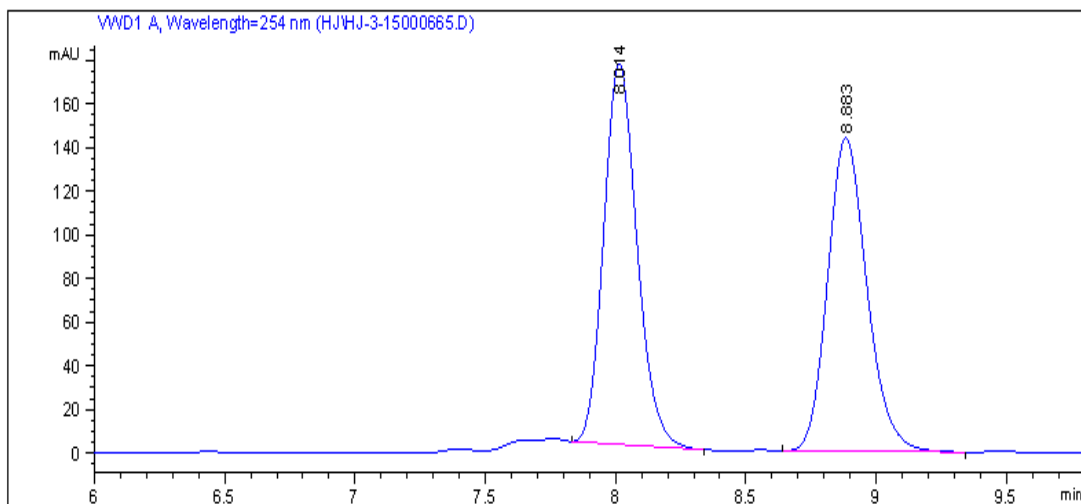

| Peak # | RetTime [min] | Type | Width [min] | Area [mAU*s] | Height [mAU] | Area %  |
|--------|---------------|------|-------------|--------------|--------------|---------|
| 1      | 8.014         | BBA  | 0.1357      | 1546.61328   | 174.01872    | 50.7084 |
| 2      | 8.883         | BB   | 0.1626      | 1503.40137   | 143.09990    | 49.2916 |

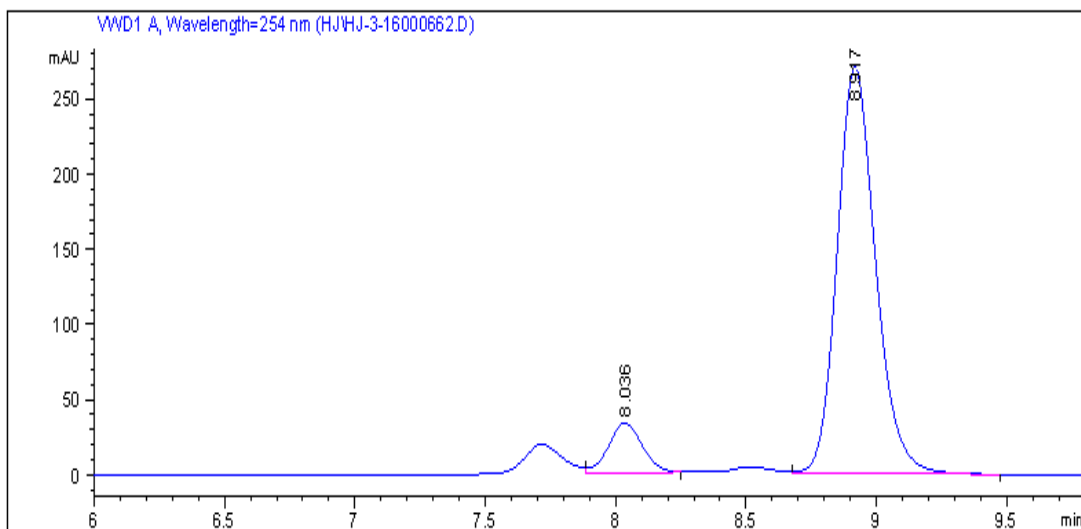

| Peak # | RetTime [min] | Type | Width [min] | Area [mAU*s] | Height [mAU] | Area %  |
|--------|---------------|------|-------------|--------------|--------------|---------|
| 1      | 8.036         | VV   | 0.1375      | 298.78506    | 33.05334     | 9.7576  |
| 2      | 8.917         | VB   | 0.1596      | 2763.29053   | 269.52576    | 90.2424 |



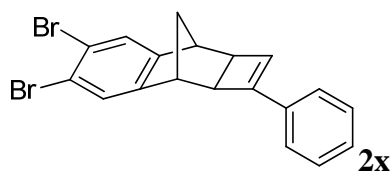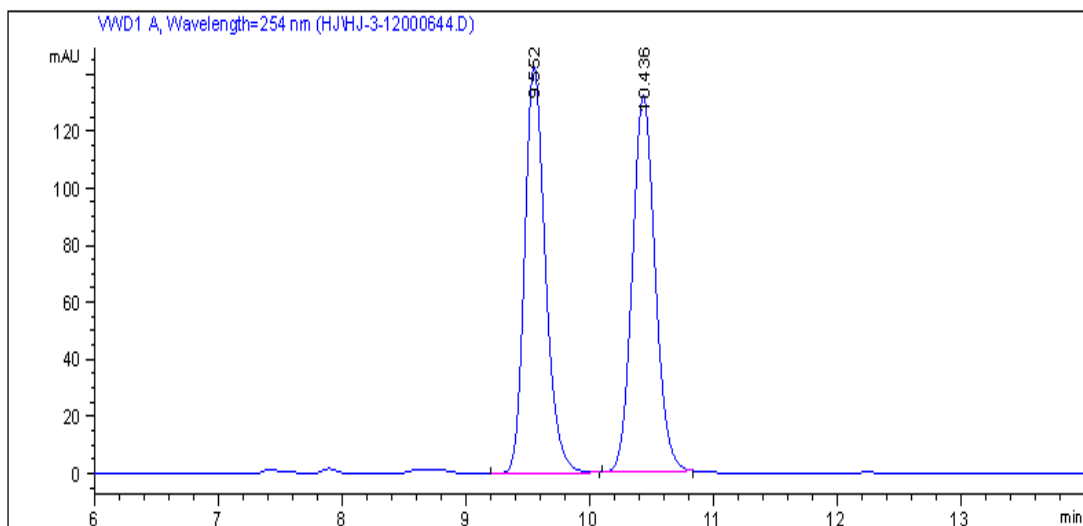

| Peak # | RetTime [min] | Type | Width [min] | Area [mAU*s] | Height [mAU] | Area %  |
|--------|---------------|------|-------------|--------------|--------------|---------|
| 1      | 9.552         | BB   | 0.1798      | 1659.56689   | 142.61021    | 49.5768 |
| 2      | 10.436        | BBA  | 0.1976      | 1687.89844   | 131.62720    | 50.4232 |

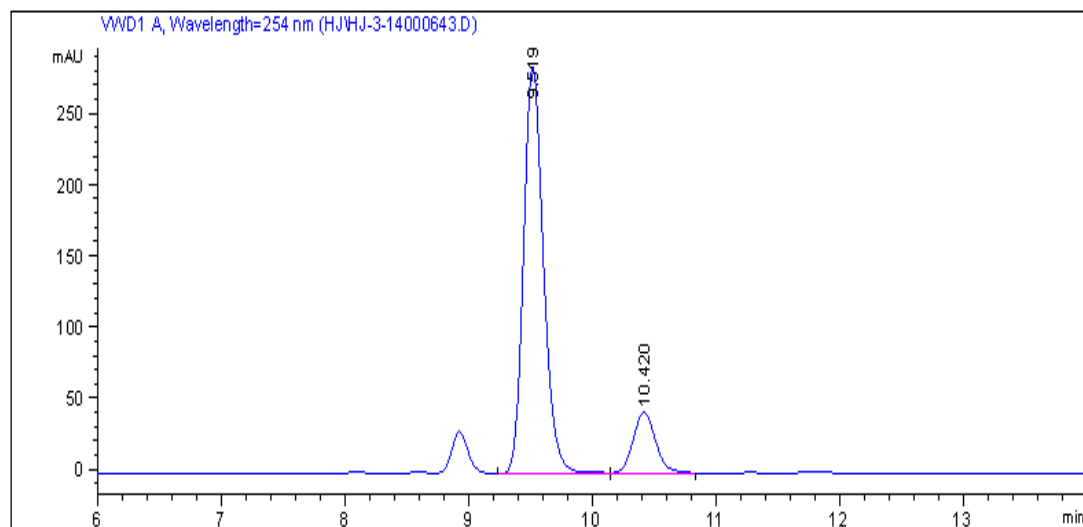

| Peak # | RetTime [min] | Type | Width [min] | Area [mAU*s] | Height [mAU] | Area %  |
|--------|---------------|------|-------------|--------------|--------------|---------|
| 1      | 9.519         | BV   | 0.1701      | 3184.92969   | 285.55975    | 85.5529 |
| 2      | 10.420        | VBA  | 0.1994      | 537.83008    | 42.55865     | 14.4471 |
